# Supplementary material for: Nutritional practices and growth of preterm infants in two neonatal units in the UK and Malaysia: a prospective exploratory study
Source: PubMed Central journal article supplement — BMJ Paediatr Open. 2021 Aug 24;5(1):e001153. doi: 10.1136/bmjpo-2021-001153 (PMC8386205; doi:10.1136/bmjpo-2021-001153), 2021-08-24
Supplement: bmjpo-2021-001153.draft_revisions.pdf [file bmjpo-2021-001153.draft_revisions.pdf]

# BMJ Paediatrics Open

BMJ Paediatrics Open is committed to open peer review. As part of this commitment we make the peer review history of every article we publish publicly available.

When an article is published we post the peer reviewers' comments and the authors' responses online. We also post the versions of the paper that were used during peer review. These are the versions that the peer review comments apply to.

The versions of the paper that follow are the versions that were submitted during the peer review process. They are not the versions of record or the final published versions. They should not be cited or distributed as the published version of this manuscript.

BMJ Paediatrics Open is an open access journal and the full, final, typeset and author-corrected version of record of the manuscript is available on our site with no access controls, subscription charges or pay-per-view fees (<http://bmjpaedsopen.bmj.com>).

If you have any questions on BMJ Paediatrics Open's open peer review process please email [info.bmjpo@bmj.com](mailto:info.bmjpo@bmj.com)

# BMJ Paediatrics Open

## Nutrition and growth of preterm infants in the UK and Malaysia: a prospective observational study

|                               |                                                                                                                                                                                                                                                                                                                                                                                                                                                                                                                                                                                                                                                                             |
|-------------------------------|-----------------------------------------------------------------------------------------------------------------------------------------------------------------------------------------------------------------------------------------------------------------------------------------------------------------------------------------------------------------------------------------------------------------------------------------------------------------------------------------------------------------------------------------------------------------------------------------------------------------------------------------------------------------------------|
| Journal:                      | <i>BMJ Paediatrics Open</i>                                                                                                                                                                                                                                                                                                                                                                                                                                                                                                                                                                                                                                                 |
| Manuscript ID                 | bmjpo-2021-001153                                                                                                                                                                                                                                                                                                                                                                                                                                                                                                                                                                                                                                                           |
| Article Type:                 | Original research                                                                                                                                                                                                                                                                                                                                                                                                                                                                                                                                                                                                                                                           |
| Date Submitted by the Author: | 03-May-2021                                                                                                                                                                                                                                                                                                                                                                                                                                                                                                                                                                                                                                                                 |
| Complete List of Authors:     | Abdul Hamid, Haslina; University of Nottingham, Population and Lifespan Sciences, School of Medicine; Universiti Kebangsaan Malaysia, Dietetic Programme, Faculty of Health Sciences<br>Szatkowski, Lisa; University of Nottingham, Population and Lifespan Sciences, School of Medicine<br>Budge, Helen; University of Nottingham, Population and Lifespan Sciences, School of Medicine<br>Cheah, Fook-Choe; Universiti Kebangsaan Malaysia, Department of Paediatrics, Faculty of Medicine<br>Ojha, Shalini; University of Nottingham, Population and Lifespan Sciences, School of Medicine; University Hospitals of Derby and Burton NHS Foundation Trust, Neonatal Unit |
| Keywords:                     | Neonatology, Growth                                                                                                                                                                                                                                                                                                                                                                                                                                                                                                                                                                                                                                                         |
|                               |                                                                                                                                                                                                                                                                                                                                                                                                                                                                                                                                                                                                                                                                             |

SCHOLARONE™  
Manuscripts

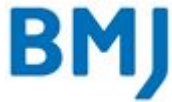

I, the Submitting Author has the right to grant and does grant on behalf of all authors of the Work (as defined in the below author licence), an exclusive licence and/or a non-exclusive licence for contributions from authors who are: i) UK Crown employees; ii) where BMJ has agreed a CC-BY licence shall apply, and/or iii) in accordance with the terms applicable for US Federal Government officers or employees acting as part of their official duties; on a worldwide, perpetual, irrevocable, royalty-free basis to BMJ Publishing Group Ltd ("BMJ") its licensees and where the relevant Journal is co-owned by BMJ to the co-owners of the Journal, to publish the Work in this journal and any other BMJ products and to exploit all rights, as set out in our [licence](#).

The Submitting Author accepts and understands that any supply made under these terms is made by BMJ to the Submitting Author unless you are acting as an employee on behalf of your employer or a postgraduate student of an affiliated institution which is paying any applicable article publishing charge ("APC") for Open Access articles. Where the Submitting Author wishes to make the Work available on an Open Access basis (and intends to pay the relevant APC), the terms of reuse of such Open Access shall be governed by a Creative Commons licence – details of these licences and which [Creative Commons](#) licence will apply to this Work are set out in our licence referred to above.

Other than as permitted in any relevant BMJ Author's Self Archiving Policies, I confirm this Work has not been accepted for publication elsewhere, is not being considered for publication elsewhere and does not duplicate material already published. I confirm all authors consent to publication of this Work and authorise the granting of this licence.

1  
2  
3 **Nutrition and growth of preterm infants in the UK and Malaysia: prospective**  
4 **observational study**  
5  
6  
7

8 Haslina Binti Abdul Hamid<sup>1,2</sup>, Lisa Szatkowski<sup>1</sup>, Helen Budge<sup>1</sup>, Fook Choe Cheah<sup>3</sup>,

9  
10 Shalini Ojha<sup>1,4</sup>  
11

12  
13  
14 **Corresponding author:** Shalini Ojha  
15

16 Room 4117, Medical School Building, Royal Derby Hospital, Derby, DE23 3DT.  
17

18 Email: [shalini.ojha@nottingham.ac.uk](mailto:shalini.ojha@nottingham.ac.uk)  
19

20 Telephone: +44 1332 724691  
21  
22

23  
24 Haslina Binti Abdul Hamid  
25

26 <sup>1</sup>Population and Lifespan Sciences, School of Medicine, University of Nottingham,  
27  
28 UK  
29

30 <sup>2</sup>Dietetic Programme, Faculty of Health Sciences, Universiti Kebangsaan Malaysia,  
31  
32 50300 Kuala Lumpur  
33  
34

35  
36 Lisa Szatkowski  
37

38 <sup>1</sup>Population and Lifespan Sciences, School of Medicine, University of Nottingham,  
39  
40 UK  
41

42  
43  
44 Helen Budge  
45

46 <sup>1</sup>Population and Lifespan Sciences, School of Medicine, University of Nottingham,  
47  
48 UK  
49

50  
51 Fook Choe Cheah  
52

53 <sup>3</sup>Department of Paediatrics, Faculty of Medicine, Universiti Kebangsaan Malaysia,  
54  
55 56000 Kuala Lumpur  
56  
57  
58  
59  
60

1  
2  
3  
4  
5  
6  
7  
8  
9  
10  
11  
12  
13  
14  
15  
16  
17  
18  
19  
20  
21  
22  
23  
24  
25  
26  
27  
28  
29  
30  
31  
32  
33  
34  
35  
36  
37  
38  
39  
40  
41  
42  
43  
44  
45  
46  
47  
48  
49  
50  
51  
52  
53  
54  
55  
56  
57  
58  
59  
60

Shalini Ojha

<sup>1</sup>Population and Lifespan Sciences, School of Medicine, University of Nottingham,

UK

<sup>4</sup>Neonatal Unit, University Hospitals of Derby and Burton, Derby, DE23 3DT

Word Count: 2485

Key words: infant, preterm, nutrition, growth

Confidential: For Review Only

**ABSTRACT**

**Objective** To compare nutritional practices among preterm infants in neonatal units in Malaysia and the UK and assess the association with weight changes at discharge.

**Design** Prospective observational study of infants born <34 weeks gestational age (GA).

**Setting** Two neonatal units, one in Malaysia and one in the UK.

**Methods** Nutrition and growth data were collected from birth between May 2019 to March 2020 and compared between units. Factors associated with changes in weight-for-age Z-score (WAZ) at discharge were analysed.

**Results** From 100 infants included, median GA (IQR) was 31(30-33) and mean±SD birthweight was 1549±444g. Malaysian infants were smaller and had more morbidities. More of them received fortified breastmilk and parenteral nutrition with higher protein intake (mean±SD Malaysia: 3.0±0.5 vs UK: 2.7±0.6g/kg/d, p=0.004) in weeks 1-4 and had smaller cumulative protein deficits (mean±SD Malaysia: 11.4±6.1 vs UK: 15.4±8.0g/kg, p=0.006). More than half of the infants in both units had >-1.28 changes in WAZ at discharge (p=0.841). Length of stay was negatively associated with changes in WAZ in Malaysian infants (adjusted  $\beta$  of -0.01, p<0.001). In the UK unit, protein and protein energy ratio were positively associated with changes in WAZ (adjusted  $\beta$  of 0.36 and 0.34, p=0.004 and 0.027).

**Conclusions** There were differences in patient characteristics, nutritional practices and intakes. Weight changes among Malaysian infants were influenced by non-nutritional factors despite numerically sufficient intakes. In the UK, low protein intakes affected weight. Nutritional recommendations should take local demographics into consideration and optimising intakes should be prioritised.

**Word count: 247**

**What is already known on this topic**

1. There is a high rate of postnatal growth failure among preterm infants in neonatal units worldwide.
2. Varied nutritional practices such as parenteral nutrition and protein intakes are independent predictors of the growth outcomes of preterm infants at discharge.

**What this study adds**

1. Preterm infants' co-morbidities which possibly lead to longer hospital stay might be associated with growth failure at discharge.
2. Protein deficits are independently associated with growth failure at discharge.
3. Current nutrient recommendations should be modified to target infants of lower gestations and those at-risk of severe co-morbidities.
4. Demographic and nutritional practice differences affecting growth outcomes in preterm infants between the countries with upper- middle- and high-incomes

## INTRODUCTION

Growth is one of the most important outcomes in determining the well-being of a preterm infant (1), and provision of optimal nutrition is a modifiable independent factor that could facilitate growth (2). Recommendations such as early initiation of parenteral nutrition (PN) and enteral nutrition (EN), shorter time in reaching full enteral feeding and the use of breast milk fortifier (BMF) may optimise growth outcomes in preterm infants (3). However, it is uncertain whether similar recommendations can be applied to different settings in which preterm infants are cared for. Factors such as clinical traditions and resource limitations in hospitals may influence the adoption of effective feeding practices (4). Internationally, nutritional recommendations (5,6) have been created and studied for preterm populations in the UK (7), USA (8) and other high-income settings (9). However, there is a paucity of studies in this area among low- and middle-income countries, despite the growing availability of neonatal intensive care in these settings. This study compares nutritional practices in a neonatal unit in Malaysia, as a lower income setting, with one in the UK. Secondly, the study investigates the association between the nutritional practices and postnatal growth in both units.

## METHODS

The study was carried out in the neonatal units of the Royal Derby Hospital, UK and the Hospital Canselor Tuanku Muhriz, Malaysia, from May 2019 to March 2020. The UK unit is a Local Neonatal Unit (level II) (10) routinely caring for infants born at >25 weeks GA. More immature infants and those requiring surgical care are transferred to appropriate centres. The Malaysia unit is a tertiary neonatal unit ( level IIIb) (11) which also provides surgical support on-site (except for cardiac surgery).

Infants <34 weeks' GA who were admitted to either unit were recruited consecutively and followed to discharge until the sample size of 50 was reached at



1  
2  
3 each site. Infants were included if admitted within 24 hours of birth, not transferred  
4 out for any part of their care and had length of stay of  $\geq 14$  days. Infants with major  
5 congenital anomalies, genetic abnormalities or missing records for  $\geq 3$  days were  
6 excluded. The number of infants included was determined based on the usual  
7 monthly admissions and length of stay at the respective units which was estimated  
8 to be from 30 to 50 infants. Therefore, collection of data from 50 infants from each  
9 unit (total of 100) was deemed to be feasible.  
10  
11  
12  
13  
14  
15  
16  
17  
18  
19

20 Anonymised data were extracted from paper or electronic medical records  
21 (accessed from BadgerNet (Client version 2.9.1.0) in the UK, and the Caring  
22 Hospital Enterprise System (C-HETS) in Malaysia).  
23  
24  
25  
26  
27

### 28 **Baseline and feeding data**

29  
30 Infant and maternal characteristics including sex, GA at birth, maternal age, and  
31 parity as well as infants' clinical characteristics were collected prospectively. Daily  
32 nutritional intakes including parenteral nutrition (PN) and enteral nutrition (EN) were  
33 recorded. The nutritional content of EN and PN were calculated based on the  
34 manufacturers' literature while the composition of breast milk was based on current  
35 evidence (12). Nutrient deficits were calculated as the difference between actual  
36 intake and the intake recommended by ESPGHAN (2010) guidelines (5).  
37  
38  
39  
40  
41  
42  
43  
44  
45  
46  
47

### 48 **Growth measures**

49 Fenton growth chart (13) was used as a reference for all growth assessments in  
50 both units in determining Z-scores. It was chosen for this study for its advantage of  
51 using more recent and larger sample of preterm infants' data from many countries  
52 which link to the WHO growth data. In this study, only weight and head  
53 circumference (HC) measurements were assessed, as length is not routinely  
54 measured in the UK unit.  
55  
56  
57  
58  
59  
60

1  
2  
3  
4  
5 The marker for growth used in this study is the change in weight-for-age Z-scores  
6 (WAZ) from birth to discharge which was determined by subtracting the WAZ at  
7 birth from the WAZ at discharge. This was used due to the better sensitivity of  
8 weight than HC measurements in determining short term growth and Z-score as the  
9 best system for presentation and evaluation of anthropometric data (14) especially  
10 in indicating change over time. Postnatal growth failure was defined as a decrease  
11 in WAZ between birth and discharge of  $\geq 1.28$  as used in previous studies (15,16).  
12  
13 SGA was defined as birth weight < 10<sup>th</sup> centile for birth weight (17).  
14  
15  
16  
17  
18  
19  
20  
21  
22  
23

### 24 **Statistical analysis**

25 All statistical analyses were performed using STATA 16.0 (Stata Corp. College  
26 Station, TX). Descriptive statistics were used to summarise the demographic and  
27 clinical characteristics of infants and their mothers. Infants' EN, PN and combined  
28 intakes in weeks 1-4 and weeks 5-8 and the cumulative deficits accrued in this  
29 period were analysed. Growth outcomes and other variables collected at discharge  
30 were also compared.  
31  
32  
33  
34  
35  
36  
37  
38  
39  
40

41 Univariable analyses were used to explore factors that predicted changes in WAZ  
42 separately for each unit. In the exploratory analysis, variables with missing data  
43 such as intakes on weeks 5-8 for infants who were discharged before this period  
44 were excluded. Rare clinical conditions where fewer than 10 babies experienced  
45 that outcome were also excluded. Variables which were statistically significant at the  
46 5% significance level in the univariable analysis and considered clinically important,  
47 were entered into a multivariable model. Likelihood ratio tests were used to build a  
48 final parsimonious multivariable model. Correlation between variables was  
49 assessed using the variance inflation factor (VIF) with a VIF of less than 5 taken to  
50 indicate no substantial correlation (18).  
51  
52  
53  
54  
55  
56  
57  
58  
59  
60

### Regulatory approvals

Ethical approval was obtained from the Health Research Authority (HRA) and Health and Care Research Wales (HCRW) Approval (United Kingdom) [IRAS project ID: 258817, Protocol number: 19012] and Research Ethics Committee, National University of Malaysia, UKM (Malaysia) [JEP-2019-325]. No parental consent was sought as this was an observational study using routinely recorded clinical data.

### Patient and Public Involvement

Patients or the public were not involved in the design, conduct, reporting or distribution plans of our study.

## RESULTS

In this study, infants in Malaysia and the UK units were of similar GA, but Malaysian infants were lighter and had a lower WAZ and length-for-age Z-scores at birth although the HC Z-scores were not different (Table 1). There were more SGA infants in Malaysia (12/50; 24%) compared to the UK unit (3/50; 6%) ( $p=0.039$ ). In Malaysia unit, there were fewer multiple births, more morbidities, mothers were older and had had more previous births (Table 1).

### Enteral feeding

Milk feeding was started on median day of life (DOL) of 2 ( $p=0.833$ ) in both units. Full milk feeds (defined as 150 ml/kg/day EN with no PN) was reached on median (IQR) DOL 9 (7-12) in Malaysia and DOL 8 (7-10) in the UK,  $p=0.400$  (Table 2).

More infants in Malaysia received any mother's own milk (MOM) during admission (Malaysia: 98% vs UK: 76%,  $p=0.001$ ) and more infants in the UK received formula

1  
2  
3 milk (Malaysia: 80% vs. UK: 94%,  $p=0.037$ ). Among infants who were fed their  
4  
5 MOM, 86% infants had BMF added on median (IQR) DOL 11 (8-16) in Malaysia  
6  
7 when they were receiving a median (IQR) milk volume of 154 (149-164) ml/kg/d  
8  
9 while 26% infants had BMF added on median (IQR) DOL 15 (10-20) at median  
10  
11 (IQR) milk volume of 157 (132-167) ml/kg/d,  $p=0.655$  in the UK. At discharge, 52%  
12  
13 infants were exclusively breast milk-fed in Malaysia compared to 32% in the UK  
14  
15 ( $p=0.043$ ) (Table 2).  
16  
17  
18  
19

### 20 **Parenteral feeding**

21  
22 40 (80%) infants received PN in Malaysia compared to 19 (38%) in the UK. PN was  
23  
24 started on a median DOL 2 in both units ( $p=0.414$ ) but was given for longer in  
25  
26 Malaysia than in the UK (median (IQR) days of PN in Malaysia: 9 (6-14) vs. UK: 6  
27  
28 (5-8),  $p=0.031$ ) (Table 2).  
29  
30  
31  
32

### 33 **Nutritional intakes**

34  
35 There was no difference in energy intakes in weeks 1-4 between the two units  
36  
37 ( $p=0.238$ ). However, Malaysian infants received more protein (Malaysia:  $3.0\pm 0.5$   
38  
39 g/kg/d vs UK:  $2.7\pm 0.6$  g/kg/d,  $p=0.004$ ) and had smaller cumulative energy and  
40  
41 protein deficits over this period, than the UK infants (Malaysia (energy):  
42  
43  $191.6\pm 129.8$  vs UK:  $254.5\pm 152.0$  kcal/kg,  $p=0.028$  and Malaysia (protein): $11.4\pm 6.1$   
44  
45 vs UK:  $15.4\pm 8.0$ g/kg,  $p=0.006$ ). Protein energy ratio (PER) was also higher in the  
46  
47 Malaysia unit (Malaysia:  $3.03\pm 0.31$  g/100kcal/d vs. UK:  $2.61\pm 0.48$  g/100kcal/d,  
48  
49  $p<0.001$ ) (Table 2).  
50  
51  
52  
53

54 For those infants who remained in the hospital in weeks 5-8 of life (Malaysia:  $n=28$ ,  
55  
56 UK:  $n=23$ ), better energy intakes were shown in both units although energy deficits  
57  
58 in the UK cohort persisted. No difference in protein intakes was found between units  
59  
60 but cumulative protein deficits in Malaysian infants improved while the magnitude of

1  
2  
3 the deficit worsened in UK infants (Malaysia:  $8.7 \pm 11.8$  g/kg vs UK:  $24.5 \pm 25.6$  g/kg,  
4  
5  $p=0.005$ ).

### 11 **Postnatal growth**

12  
13 There were no differences in growth outcomes at discharge between infants from  
14 the two units (Table 3). WAZ declined by  $\geq 1.28$  in 52% and 54% of infants in  
15 Malaysia and the UK, respectively. The mean  $\pm$  SD change in WAZ between birth  
16 and discharge was similar between the two cohorts (Malaysia:  $-1.31 \pm 0.57$ ; UK: -  
17  $1.33 \pm 0.58$ ;  $p=0.975$ ) (Table 3).

### 26 **Factors associated with change in WAZ from birth to discharge**

27  
28 In Malaysia, in univariable analyses, birthweight, HC and length at birth, GA at birth,  
29 being very/extremely preterm/low birthweight, length of stay, diagnosis of IVH and  
30 CLD, the use of IV fluid, PN, duration of PN, and DOL to reach full feed and first  
31 BMF use, were associated with changes in WAZ at discharge. After adjustment, the  
32 final multivariable regression model showed that length of stay was the only  
33 predictor that remained significant, showing negative changes in WAZ with longer  
34 hospital stay (adjusted  $\beta$  of  $-0.01$ ,  $p < 0.001$ , adjusted  $R^2$  of 0.35) (Table 4).

35  
36  
37 In the UK, birthweight Z-score, mother's age, length of stay, protein intake in weeks  
38 1-4, PER in weeks 1-4 and DOL reaching full enteral feeds, were significant in  
39 univariable models and remained so in the multivariable model (adjusted  $R^2$  of  
40 0.62). Of these variables, protein intakes and PER weeks 1-4 showed positive  
41 association with growth at discharge, indicating improved changes in WAZ with  
42 higher intakes of protein and PER in weeks 1-4 (Table 4).

## DISCUSSION

The study found that more Malaysian infants received breast milk as compared to UK infants. This is consistent with each countries' national reports (19,20) that record a higher rate of breastfeeding among Malaysian infants. The higher rate of breastmilk feeding among Malaysian infants is possibly related to older maternal age and higher parity among mothers, as shown in many studies (21,22). The Malaysian unit has an established accreditation as Baby Friendly Hospital (BFH) (23) which is favourably related to the high rate of initiation and continuation of breastfeeding (24,25). The UK unit has achieved stage 1 of BFI accreditation and is building towards a stage 2 (26).

More Malaysian infants received PN which could be related to more SGA infants and higher rates of co-morbidities in this level IIIb unit where clinicians are more likely to give PN to enhance nutrition. Infants in the UK unit were larger and less unwell and hence more likely to establish enteral feeding and avoid initial or prolonged need for PN. Furthermore, more BMF use and higher use of protein supplementation were also practiced in Malaysia unit, while BMF was used more selectively in the UK unit. These distinctions in practice possibly explain the differences in nutrient intakes where Malaysian infants had higher protein intakes, lower cumulative deficits and earlier recovery of deficits.

Despite the differences in intakes, weight changes were similar in both units. Hospital stay was shown to be the only predictor for WAZ changes at discharge for Malaysian infants. This may be as due to smaller infants with greater burden of illnesses have longer stay and sub-optimal growth (27,28). In addition, more aggressive nutritional practices are practiced in Malaysia unit, enabling faster weight gain among clinically stable infants. This is to encourage earlier discharge due to limited space and resources in the unit, while sicker infants stay longer.

1  
2  
3  
4  
5 However, hospital stay accounted for only 35% of variation in changes in WAZ in  
6 this cohort. The remaining unexplained variation could be a combination of several  
7 other underlying factors. For example, this study shows that Malaysian infants were  
8 generally lighter and shorter than infants in the UK. This could be attributed to  
9 genetic influence (29) and generally higher rates of LBW in Malaysian infants as  
10 previously reported (30). However, there is a possibility that these differences are  
11 not entirely genetic and factors such as maternal and in-utero undernutrition  
12 underlie the smaller size at birth especially as there was no difference observed in  
13 HC between the two units (31).  
14  
15  
16  
17  
18  
19  
20  
21  
22  
23  
24  
25

26 In the UK unit, protein intakes and PER, which accounted for the largest variation in  
27 changes in WAZ, have also been shown to affect postnatal growth in previous  
28 studies (9,32). Even though formula milk offers higher protein intakes than  
29 unfortified breast milk (33,34), MOM is the optimal food for preterm infants and can  
30 be fortified when needed. Nearly half of the infants in this cohort received a mix of  
31 formula milk (2.0-2.6g protein/100ml) and unfortified breast milk (1.3-1.9 g  
32 protein/100ml). However, as a group, they did not achieve the recommended intake  
33 at 3.5 g/kg/d. Previous studies show that protein intakes aimed at >3.5-3.8 g/kg/d  
34 led to decreased cumulative deficits and better growth (35,36). Fortifying breast milk  
35 in more infants would increase protein intake although this would also involve using  
36 a cow's milk product and interfere with the exclusive breast milk feeding at least in  
37 some infants.  
38  
39  
40  
41  
42  
43  
44  
45  
46  
47  
48  
49  
50  
51  
52  
53

54 Despite notable differences in intake, there were no differences in the short-term  
55 growth at discharge between the units. The differences in infant characteristics,  
56 possibly co-morbidities may explain this. Therefore, with this data, it would be  
57 pertinent to re-evaluate if the current nutritional recommendations (5) used should  
58  
59  
60

1  
2  
3 be similarly applied for all preterm infants considering the heterogeneity in  
4 intrauterine growth and co-morbidities that might affect growth. Besides, pushing for  
5 more aggressive nutrition to achieve target weights should be considered with  
6 caution, as 'optimal growth' outcome should also include longer-term growth and the  
7 neurodevelopmental and metabolic outcomes in later life. Studies show that preterm  
8 infants fed mainly breast milk have slower weight gain but show better  
9 neurodevelopmental outcomes (37,38).  
10  
11  
12  
13  
14  
15  
16  
17  
18  
19

20 The strengths of this study are that it is a two-centre cohort study with detailed daily  
21 actual nutritional intake and weekly growth data collected prospectively. However,  
22 the study is limited to a small number of infants and a larger sample size is needed  
23 to further evaluate reasons for growth failure. Maternal details including nutritional  
24 status and antenatal care should also be considered as these are vital determinants  
25 of fetal nutrition and infants' outcomes (39). Also, the predominant use of  
26 breastmilk, especially in Malaysian cohort, means that intakes were analysed by  
27 using the best available estimates (12) and may not reflect the true nutritional  
28 composition of the milk received.  
29  
30  
31  
32  
33  
34  
35  
36  
37  
38  
39  
40

## 41 **CONCLUSION**

42  
43 Current nutritional practices often do not meet recommended intakes in preterm  
44 infants. Early use of PN and EN with fortified breast milk may improve nutrient  
45 intakes. More efforts are needed to produce evidence-based nutritional intake  
46 recommendations for settings that care for a large number of smaller or sicker  
47 infants. Follow-up in later life is then needed to determine if meeting recommended  
48 nutritional targets produces better quality growth and neurodevelopmental outcomes  
49 in those born preterm.  
50  
51  
52  
53  
54  
55  
56  
57  
58  
59  
60



**Acknowledgements** We would like to acknowledge the support of all the staff at Royal Derby Hospital and Hospital Canselor Tuanku Muhriz neonatal units for their assistance during the data collection process of this study. We also would like to acknowledge Janine Abramson and Coral Smith who assisted in the electronic data collection in the UK unit, Drs Cho Cho Latt and Tian-Lee Tan for the data collection in Malaysia unit.

**Contributors** HAH, SO, LS, HB and FCC conceptualised and designed the study and reviewed and revised the manuscript. HAH performed the data collection in the UK unit, completed the data analysis and drafted the initial manuscript. All authors approved the final manuscript as submitted and agree to be accountable for all aspects of the work.

**Funding** HAH is supported by a PhD scholarship from the Ministry of Higher Education Malaysia and Universiti Kebangsaan Malaysia (UKM).

**Competing interests** None declared.

**Patient consent** Not required.

**Provenance and peer review** Yes

## References

1. Young A, Andrews ET, Ashton JJ, Pearson F, Beattie RM, Johnson MJ. Generating longitudinal growth charts from preterm infants fed to current recommendations. *Arch Dis Child - Fetal Neonatal Ed.* 2020 Nov;105(6):646–51.
2. Stoltz Sjöström E, Öhlund I, Ahlsson F, Engström E, Fellman V, Hellström A, et al. Nutrient intakes independently affect growth in extremely preterm infants: Results from a population-based study. *Acta Paediatr Int J Paediatr.* 2013;102(11):1067–74.
3. Maas C, Poets CF, Franz AR. Avoiding postnatal undernutrition of vlbw infants during neonatal intensive care: Evidence and personal view in the absence of evidence. *Arch Dis Child Fetal Neonatal Ed.* 2015;100(1):F76–81.
4. de Waard M, Li Y, Zhu Y, Ayede AI, Berrington J, Bloomfield FH, et al. Time to Full Enteral Feeding for Very Low-Birth-Weight Infants Varies Markedly Among Hospitals Worldwide But May Not Be Associated With Incidence of Necrotizing

- 1  
2  
3 Enterocolitis: The NEOMUNE-NeoNutriNet Cohort Study. *J Parenter Enter Nutr.* 2018;  
4  
5  
6  
7 5. Agostoni C, Buonocore G, Carnielli VP, De Curtis M, Darmaun D, Decsi T, et al.  
8 Enteral nutrient supply for preterm infants: Commentary from the European  
9 Society of Paediatric Gastroenterology, Hepatology and Nutrition Committee on  
10 nutrition. *J Pediatr Gastroenterol Nutr.* 2010;50(1):85–91.  
11  
12 6. Koletzko B, Poindexter B, Uauy R. Nutrition of the preterm infant: Scientific  
13 Basis and Practical Guidelines. Basel: Karger; 2014.  
14  
15 7. Andrews ET, Ashton JJ, Pearson F, Mark Beattie R, Johnson MJ. Early  
16 postnatal growth failure in preterm infants is not inevitable. *Arch Dis Child Fetal  
17 Neonatal Ed.* 2018;10–2.  
18  
19 8. Horbar JD, Ehrenkranz RA, Badger GJ, Edwards EM, Morrow KA, Soll RF, et al.  
20 Weight Growth Velocity and Postnatal Growth Failure in Infants 501 to 1500  
21 Grams: 2000–2013. *Pediatrics.* 2015;136(1):e84–92.  
22  
23 9. Cormack BE, Jiang Y, Harding JE, Crowther CA, Bloomfield FH. Relationships  
24 between Neonatal Nutrition and Growth to 36 Weeks' Corrected Age in ELBW  
25 Babies—Secondary Cohort Analysis from the Provide Trial. *Nutrients.* 2020 Mar  
26 13;12(3):760.  
27  
28 10. British Association of Perinatal Medicine (BAPM) (2010). Service standards for  
29 hospitals providing neonatal care, 3rd edition. [Internet]. 2010. Available from:  
30 [http://www.bapm.org/publications/documents/guidelines/BAPM\\_Standards\\_Final\\_Aug2010.pdf](http://www.bapm.org/publications/documents/guidelines/BAPM_Standards_Final_Aug2010.pdf)  
31  
32  
33 11. Ministry of Health Malaysia. The Operational Policy for Paediatric Services. The  
34 Medical Services Development Section; 2012.  
35  
36 12. Gidrewicz DA, Fenton TR. A systematic review and meta-analysis of the nutrient  
37 content of preterm and term breast milk. *BMC Pediatr.* 2014 Aug 30;14:216.  
38  
39 13. Fenton T, Kim J. A systematic review and meta-analysis to revise the Fenton  
40 growth chart for preterm infants. *BMC Pediatr.* 2013;13:59.  
41  
42 14. Geneva: World Health Organization. Physical status: the use and interpretation  
43 of anthropometry. Report of a WHO Expert Committee. WHO Technical Report  
44 Series No. 854. 1995.  
45  
46 15. Lin Z, Green RS, Chen S, Wu H, Liu T, Li J, et al. Quantification of EUGR as a  
47 measure of the quality of nutritional care of premature infants. *PLoS ONE.*  
48 2015;10(7):1–10.  
49  
50 16. Lee SM, Kim N, Namgung R, Park M, Park K, Jeon J. Prediction of Postnatal  
51 Growth Failure among Very Low Birth Weight Infants. *Sci Rep.* 2018;8(1):1–8.  
52  
53 17. Darmaun D, Lapillonne A, Simeoni U, Picaud J-C, Rozé J-C, Saliba E, et al.  
54 Parenteral nutrition for preterm infants: Issues and strategy. *Arch Pediatr  
55 Organe Off Soc Francaise Pediatr.* 2018 May;25(4):286–94.  
56  
57 18. Kim J. Multicollinearity and misleading statistical results. *Korean J Anesthesiol.*  
58 2019 Dec 1;72(6):558–69.  
59  
60

19. Institute for Public Health. The National Health and Morbidity Survey (NHMS) 2016 [Internet]. Kuala Lumpur: Institute for Public Health, National Institutes of Health, Ministry of Health Malaysia; 2016. Available from: <http://iku.moh.gov.my/images/IKU/Document/REPORT/2016/NHMS2016ReportVolumell-MaternalChildHealthFindingsv2.pdf>
20. NHS Maternity Statistics, England 2017-18. Maternity and Breastfeeding [Internet]. Available from: <https://www.england.nhs.uk/statistics/statistical-work-areas/maternity-and-breastfeeding/>
21. Casey PH, Whiteside-Mansell L, Barrett K, Bradley RH, Gargus R. Impact of prenatal and/or postnatal growth problems in low birth weight preterm infants on school-age outcomes: an 8-year longitudinal evaluation. *Pediatrics*. 2006 Sep;118(3):1078–86.
22. Bonnet C, Blondel B, Piedvache A, Wilson E, Bonamy AE, Gortner L, et al. Low breastfeeding continuation to 6 months for very preterm infants: A European multiregional cohort study. *Matern Child Nutr* [Internet]. 2019 Jan [cited 2021 Feb 15];15(1). Available from: <https://onlinelibrary.wiley.com/doi/abs/10.1111/mcn.12657>
23. Ministry of Health Malaysia. National Breastfeeding Policy 2005 [Internet]. 2005. Available from: <http://nutrition.moh.gov.my/wp-content/uploads/penerbitan/poster/polisi%20penyusuan%20ibu.jpg>
24. Spaeth A, Zemp E, Merten S, Dratva J. Baby-Friendly Hospital designation has a sustained impact on continued breastfeeding. *Matern Child Nutr*. 2018 Jan;14(1):e12497.
25. Broadfoot M, Britten J, Tappin DM, MacKenzie JM. The Baby Friendly Hospital Initiative and breast feeding rates in Scotland. *Arch Dis Child Fetal Neonatal Ed*. 2005 Mar;90(2):F114-116.
26. UNICEF UK. Accreditation [Internet]. 2019. Available from: <https://www.unicef.org.uk/babyfriendly/accreditation/>
27. Maier RF, Blondel B, Piedvache A, Misselwitz B, Petrou S, Van Reempts P, et al. Duration and Time Trends in Hospital Stay for Very Preterm Infants Differ Across European Regions\*: *Pediatr Crit Care Med*. 2018 Dec;19(12):1153–61.
28. Zainal H, Dahlui M, Soelar SA, Su TT. Cost of preterm birth during initial hospitalization: A care provider's perspective. *Isangula KG, editor. PLOS ONE*. 2019 Jun 25;14(6):e0211997.
29. Chen ST. Growth chart based on longitudinal study of Malaysian children from birth to six years. *Med J Malays*. 1985 Jun;40(2).
30. United Nations Children's Fund (UNICEF), World Health Organization (WHO). UNICEF-WHO Low birthweight estimates: Levels and trends 2000–2015 [Internet]. Geneva: World Health Organization; 2019. Available from: <https://apps.who.int/iris/bitstream/handle/10665/324783/WHO-NMH-NHD-19.21-eng.pdf?ua=1>

- 1  
2  
3 31. Fleiss B, Wong F, Brownfoot F, Shearer IK, Baud O, Walker DW, et al.  
4 Knowledge Gaps and Emerging Research Areas in Intrauterine Growth  
5 Restriction-Associated Brain Injury. *Front Endocrinol*. 2019 Mar 29;10:188.  
6
- 7 32. Fenton TR, Al-Wassia H, Premji SS, Sauve RS. Higher versus lower protein  
8 intake in formula-fed low birth weight infants. *Cochrane Neonatal Group*, editor.  
9 *Cochrane Database Syst Rev* [Internet]. 2020 Jun 23 [cited 2020 Oct 21];  
10 Available from: <http://doi.wiley.com/10.1002/14651858.CD003959.pub4>  
11
- 12 33. Schanler RJ, Shulman RJ, Lau C, Smith EO, Heitkemper MM. Feeding  
13 strategies for premature infants: randomized trial of gastrointestinal priming and  
14 tube-feeding method. *Pediatrics*. 1999 Feb;103(2):434–9.  
15
- 16 34. Carlson SJ, Ziegler EE. Nutrient intakes and growth of very low birth weight  
17 infants. *J Perinatol Off J Calif Perinat Assoc*. 1998 Aug;18(4):252–8.  
18
- 19 35. Senterre T, Rigo J. Reduction in postnatal cumulative nutritional deficit and  
20 improvement of growth in extremely preterm infants. *Acta Paediatr Int J*  
21 *Paediatr*. 2012;101(2):64–70.  
22
- 23 36. Embleton NE, Pang N, Cooke RJ. Postnatal Malnutrition and Growth  
24 Retardation: An Inevitable Consequence of Current Recommendations in  
25 Preterm Infants? *Pediatrics*. 2001;107(2):270–3.  
26
- 27 37. Rozé J-C, Darmaun D, Boquien C-Y, Flamant C, Picaud J-C, Savagner C, et al.  
28 The apparent breastfeeding paradox in very preterm infants: relationship  
29 between breast feeding, early weight gain and neurodevelopment based on  
30 results from two cohorts, EPIPAGE and LIFT. *BMJ Open*. 2012 Jan  
31 1;2(2):e000834.  
32
- 33 38. Vohr BR, Poindexter BB, Dusick AM, McKinley LT, Higgins RD, Langer JC, et  
34 al. Persistent beneficial effects of breast milk ingested in the neonatal intensive  
35 care unit on outcomes of extremely low birth weight infants at 30 months of age.  
36 *Pediatrics*. 2007 Oct;120(4):e953-959.  
37
- 38 39. McCowan L, Roberts C, Dekker G, Taylor R, Chan E, Kenny L, et al. Risk  
39 factors for small-for-gestational-age infants by customised birthweight centiles:  
40 data from an international prospective cohort study: Risk factors for SGA infants  
41 by customised centiles. *BJOG Int J Obstet Gynaecol*. 2010 Dec;117(13):1599–  
42 607.  
43  
44  
45  
46  
47  
48  
49  
50  
51  
52  
53  
54  
55  
56  
57  
58  
59  
60

## Tables

Table 1: Infant and maternal characteristics of infants born at <34 weeks' gestational age and cared for in a neonatal unit in Malaysia and one in the UK

| Variables                                     | Infants in the Malaysian unit<br>n=50 | Infants in the UK unit<br>n=50     | p-value |
|-----------------------------------------------|---------------------------------------|------------------------------------|---------|
| Female, n (%)                                 | 21 (42)                               | 22 (44)                            | 0.84    |
| Gestational age at birth (weeks) median (IQR) | 32 (29-32, 25-33)                     | 31 (30-33, 26-33)                  | 0.736   |
| Birthweight (grams) mean (SD)                 | 1448 (458)                            | 1649 (409)                         | 0.022   |
| Birthweight-for-age z-score mean (SD)         | -0.53 (0.93)                          | -0.10 (0.70)                       | 0.009   |
| Small for gestational age, n (%)              | 12 (24)                               | 3 (6)                              | 0.012   |
| HC at birth (cm), mean (SD)                   | 28 (2.68)                             | 28.9 (2.35)                        | 0.106   |
| HC-for-age z-score at birth Mean (SD)         | -0.26 (-0.98 to 0.59, -4.2 to 2.05)   | 0.06 (-0.57 to 0.59, -3.3 to 1.54) | 0.310   |
| Length at birth (cm) mean (SD)                | 38.4 (3.65)                           | 41.9 (4.08)                        | <0.001  |
| Length at birth-for-age z-score mean (SD)     | -0.92 (1.05)                          | 0.21(1.23)                         | <0.001  |
| Singleton birth, n (%)                        | 45 (90)                               | 34 (68)                            | 0.007   |
| Mother's age (years) mean (SD)                | 32 (5)                                | 29 (5)                             | 0.009   |
| Parity, median (IQR)                          | 3 (1-4, 1-8)                          | 0 (0-1, 0-6)                       | <0.001  |
| Caesarean section, n (%)                      | 37 (74)                               | 32 (64)                            | 0.280   |
| Apgar score at 5 minutes, median (IQR)        | 9 (8-10, 3-10)                        | 9 (9, 6-10)                        | 0.844   |
| Antenatal steroid use, n (%)                  | 47 (94)                               | 42 (84)                            | 0.194   |
| Received positive pressure ventilation, n (%) | 21 (42)                               | 27 (54)                            | 0.230   |
| Late onset sepsis (confirmed), n (%)          | 13 (26)                               | 4(8)                               | <0.001  |
| Necrotising enterocolitis (suspected), n (%)  | 6 (12)                                | 3 (6)                              | 0.243   |
| Intraventricular haemorrhage, n (%)           | 36 (72)                               | 2 (4)                              | <0.001  |
| Retinopathy of prematurity, n (%)             | 4 (8)                                 | 1 (2)                              | 0.181   |
| Periventricular leukomalacia, n (%)           | 7 (14)                                | 0                                  | 0.006   |
| Chronic lung disease, n (%)                   | 10 (20)                               | 3 (6)                              | 0.036   |
| Patent ductus arteriosus, n (%)               | 16 (32)                               | 6 (12)                             | 0.014   |

HC, head circumference; IQR, inter-quartile range; SD, standard deviation

Table 2: Feeding practices and nutritional intakes in infants born at <34 weeks' gestational age and cared for in a neonatal unit in Malaysia and one in the UK

| Variables, n (%)                                                 | Malaysian group<br>n=50 | UK group<br>n=50    | p-value |
|------------------------------------------------------------------|-------------------------|---------------------|---------|
| Received any breast milk                                         | 49 (98)                 | 38 (76)             | 0.001   |
| Any breast milk at discharge                                     | 46 (92)                 | 25 (50)             | <0.001  |
| Exclusively breast milk feeding at discharge                     | 26 (52)                 | 16 (32)             | 0.043   |
| Received infant formula milk                                     | 40 (80)                 | 47 (94)             | 0.037   |
| Energy proportion (%) from breast milk**                         | 66.5<br>(40-83)         | 15.5<br>(2-82)      | 0.010   |
| Energy proportion (%) from formula milk <sup>‡</sup>             | 19.2<br>(2.2-52.3)      | 78.8<br>(12.7-93.9) | <0.001  |
| Day of life at first enteral milk feed**                         | 2 (1-3)                 | 2 (1-2)             | 0.833   |
| Day of life reaching 120 mL/kg/d feed**                          | 4<br>(4-5)              | 5<br>(4-5)          | 0.044   |
| Day of life reaching full enteral feed at 150 ml/kg/d**          | 9<br>(7-12)             | 8<br>(7-10)         | 0.400   |
| Rate of feeding advancement to full feed**                       | 13 (6-16)               | 16 (9-20)           | 0.390   |
| Received breast milk fortifier                                   | 43 (86)                 | 13 (26)             | <0.001  |
| Day of life at first breast milk fortifier received <sup>‡</sup> | 11<br>(8-16)            | 15<br>(10-20)       | 0.039   |
| Received parenteral nutrition                                    | 40 (80)                 | 19 (38)             | <0.001  |
| Day of life at first parenteral nutrition**                      | 2 (1-2)                 | 2 (1-2)             | 0.414   |
| Duration of parenteral nutrition**                               | 9 (6-14)                | 6 (5-8)             | 0.031   |
| Energy intake, kcal/kg/d*                                        |                         |                     |         |
| Week 1-4                                                         | 103 (13)                | 100 (11)            | 0.238   |
| Week 5-8                                                         | 110 (18)                | 115 (15)            | 0.363   |
| Cumulative energy deficits/excess <sup>‡</sup> , kcal/kg*        |                         |                     |         |
| Week 1-4                                                         | -191.6 (129.8)          | -254.5 (152.0)      | 0.028   |
| Week 5-8                                                         | 93.2(237.4)             | -93.8 (539.3)       | 0.105   |
| Protein intake, g/kg/d*                                          |                         |                     |         |
| Week 1-4                                                         | 3.0 (0.5)               | 2.7 (0.6)           | 0.004   |
| Week 5-8                                                         | 3.4 (0.7)               | 3.0 (0.8)           | 0.088   |
| Cumulative protein deficits/excess <sup>‡</sup> , g/kg*          |                         |                     |         |
| Week 1-4                                                         | -11.4 (6.1)             | -15.4 (8.0)         | 0.006   |
| Week 5-8                                                         | -8.7 (11.8)             | -24.5 (25.6)        | 0.005   |
| Protein energy ratio, g/100 kcal/d*                              |                         |                     |         |
| Week 1-4                                                         | 2.82 (0.28)             | 2.61 (0.48)         | 0.008   |
| Week 5-8                                                         | 3.03 (0.31)             | 2.57 (0.38)         | <0.001  |
| Fat intake, g/kg/d*                                              |                         |                     |         |
| Week 1-4                                                         | 4.8 (0.7)               | 4.8 (0.6)           | 0.627   |
| Week 5-8                                                         | 5.3 (1.0)               | 5.8 (0.7)           | 0.058   |
| Carbohydrate intake, g/kg/d*                                     |                         |                     |         |
| Week 1-4                                                         | 11.4 (1.9)              | 10.7(1.4)           | 0.020   |
| Week 5-8                                                         | 11.9 (2.0)              | 12.2(1.7)           | 0.607   |
| Fluid intake, ml/kg/d*                                           |                         |                     |         |
| Week 1-4                                                         | 137.1 (12.9)            | 138.8 (10.9)        | 0.491   |
| Week 5-8                                                         | 141.4 (22.4)            | 153.9 (13.9)        | 0.024   |

\*\*Median (IQR); \* Mean (SD); <sup>‡</sup>Negative value indicates deficits

Table 3: Postnatal growth measurements in infants born at <34 weeks' gestational age and cared for in a neonatal unit in Malaysia and one in the UK

| Variables                                                                       | Malaysia<br>n=50          | UK<br>n=50               | MD<br>(95% CI)                | p-value |
|---------------------------------------------------------------------------------|---------------------------|--------------------------|-------------------------------|---------|
| Days to regain birth weight**                                                   | 12<br>(11-14)             | 13<br>(10-16)            | -0.08<br>(-0.14 to -0.01)     | 0.247   |
| Weight (g) at discharge**                                                       | 2060<br>(1890-2390)       | 2165<br>(2050-2380)      | -0.001<br>(-0.001 to -0.0001) | 0.221   |
| Weight Z-score at discharge**                                                   | -1.65<br>(-2.3 to -1.0)   | -1.3<br>(-1.8 to -0.80)  | -0.25<br>(-0.32 to -0.19)     | 0.088   |
| Changes in weight Z-score from birth to discharge*                              | -1.31<br>(0.57)           | -1.33<br>(0.58)          | 0.01<br>(-0.22 to 0.23)       | 0.975   |
| Infants with weight Z- score change $\geq$ -1.28 from birth to discharge, n (%) | 26 (52)                   | 27 (54)                  | -                             | 0.841   |
| Head circumference at discharge, (cm)*                                          | 31.5 (1.61)               | 31.4 (1.39)              | 0.34(-0.29 to 0.98)           | 0.287   |
| Head circumference Z-score at discharge**                                       | -1.33<br>(-1.69 to -0.59) | -0.91<br>(-1.61 to -0.4) | -0.14<br>(-0.53 to 0.26)      | 0.383   |
| Gestational age at discharge**                                                  | 36.5<br>(35-38)           | 36<br>(35-37)            | 0.13<br>(0.08 to 0.17)        | 0.060   |
| Length of stay (days)**                                                         | 36<br>(22-55)             | 28.5<br>(20-52)          | 0.01<br>(-0.00 to 0.03)       | 0.157   |

\*\* Median (IQR); \* Mean (SD)

Table 4: Factors associated with the change in weight-for-age Z-score between birth and discharge

| Factors                                                                                                     | Malaysia                             |                                    | UK                                   |                                    |
|-------------------------------------------------------------------------------------------------------------|--------------------------------------|------------------------------------|--------------------------------------|------------------------------------|
|                                                                                                             | Unadjusted $\beta$ (95% CI), p-value | Adjusted $\beta$ (95% CI), p-value | Unadjusted $\beta$ (95% CI), p-value | Adjusted $\beta$ (95% CI), p-value |
| <b>Maternal and infant characteristics</b>                                                                  |                                      |                                    |                                      |                                    |
| Mother's age (years)                                                                                        | -0.02 (-0.05 to 0.01), p=0.159       |                                    | -0.04 (-0.07 to -0.02), p=0.003      | -0.03 (-0.05 to -0.01), p=0.011    |
| Birthweight-for-age Z-score                                                                                 | 0.06 (-0.11 to 0.24), p= 0.482       |                                    | -0.25 (-0.48 to -0.02), p=0.038      | -0.29 (-0.45 to -0.13), p=0.001    |
| Length of stay                                                                                              | -0.01(-0.02 to -0.01), p<0.001       | -0.01 (-0.02 to -0.01), p<0.001    | -0.01(-0.02 to 0.001), p=0.065       | -0.01 (-0.02 to -0.005), p=0.001   |
| Day of life reaching full enteral feed                                                                      | -0.05 (-0.08 to -0.02), p=0.001      |                                    | -0.08 (-0.14 to -0.02), p=0.013      | -0.05 (-0.09 to -0.004), p=0.030   |
| <b>Nutritional intakes in weeks 1-4</b>                                                                     |                                      |                                    |                                      |                                    |
| Protein intake, g/kg/d                                                                                      | -0.21(-0.51 to 0.10) p=0.178         |                                    | 0.47 (0.20 to 0.74), p=0.001         | 0.36 (0.12 to 0.59), p=0.004       |
| Protein energy ratio, g/100kcal/d                                                                           | -0.41(-0.98 to 0.16), p=0.158        |                                    | 0.48 (0.15 to 0.80), p=0.005         | 0.34 (0.04 to 0.65), p=0.027       |
| Adjusted $\beta$ values are displayed only for variables that are included in the final model of regression |                                      |                                    |                                      |                                    |



# BMJ Paediatrics Open

## Nutritional practices and growth of preterm infants in two neonatal units in the UK and Malaysia: a prospective observational study

|                               |                                                                                                                                                                                                                                                                                                                                                                                                                                                                                                                                                                                                                                                                             |
|-------------------------------|-----------------------------------------------------------------------------------------------------------------------------------------------------------------------------------------------------------------------------------------------------------------------------------------------------------------------------------------------------------------------------------------------------------------------------------------------------------------------------------------------------------------------------------------------------------------------------------------------------------------------------------------------------------------------------|
| Journal:                      | <i>BMJ Paediatrics Open</i>                                                                                                                                                                                                                                                                                                                                                                                                                                                                                                                                                                                                                                                 |
| Manuscript ID                 | bmjpo-2021-001153.R1                                                                                                                                                                                                                                                                                                                                                                                                                                                                                                                                                                                                                                                        |
| Article Type:                 | Original research                                                                                                                                                                                                                                                                                                                                                                                                                                                                                                                                                                                                                                                           |
| Date Submitted by the Author: | 09-Jul-2021                                                                                                                                                                                                                                                                                                                                                                                                                                                                                                                                                                                                                                                                 |
| Complete List of Authors:     | Abdul Hamid, Haslina; University of Nottingham, Population and Lifespan Sciences, School of Medicine; Universiti Kebangsaan Malaysia, Dietetic Programme, Faculty of Health Sciences<br>Szatkowski, Lisa; University of Nottingham, Population and Lifespan Sciences, School of Medicine<br>Budge, Helen; University of Nottingham, Population and Lifespan Sciences, School of Medicine<br>Cheah, Fook-Choe; Universiti Kebangsaan Malaysia, Department of Paediatrics, Faculty of Medicine<br>Ojha, Shalini; University of Nottingham, Population and Lifespan Sciences, School of Medicine; University Hospitals of Derby and Burton NHS Foundation Trust, Neonatal Unit |
| Keywords:                     | Neonatology, Growth                                                                                                                                                                                                                                                                                                                                                                                                                                                                                                                                                                                                                                                         |
|                               |                                                                                                                                                                                                                                                                                                                                                                                                                                                                                                                                                                                                                                                                             |

SCHOLARONE™  
Manuscripts



I, the Submitting Author has the right to grant and does grant on behalf of all authors of the Work (as defined in the below author licence), an exclusive licence and/or a non-exclusive licence for contributions from authors who are: i) UK Crown employees; ii) where BMJ has agreed a CC-BY licence shall apply, and/or iii) in accordance with the terms applicable for US Federal Government officers or employees acting as part of their official duties; on a worldwide, perpetual, irrevocable, royalty-free basis to BMJ Publishing Group Ltd ("BMJ") its licensees and where the relevant Journal is co-owned by BMJ to the co-owners of the Journal, to publish the Work in this journal and any other BMJ products and to exploit all rights, as set out in our [licence](#).

The Submitting Author accepts and understands that any supply made under these terms is made by BMJ to the Submitting Author unless you are acting as an employee on behalf of your employer or a postgraduate student of an affiliated institution which is paying any applicable article publishing charge ("APC") for Open Access articles. Where the Submitting Author wishes to make the Work available on an Open Access basis (and intends to pay the relevant APC), the terms of reuse of such Open Access shall be governed by a Creative Commons licence – details of these licences and which [Creative Commons](#) licence will apply to this Work are set out in our licence referred to above.

Other than as permitted in any relevant BMJ Author's Self Archiving Policies, I confirm this Work has not been accepted for publication elsewhere, is not being considered for publication elsewhere and does not duplicate material already published. I confirm all authors consent to publication of this Work and authorise the granting of this licence.

1  
2  
3 **Nutritional practices and growth of preterm infants in two neonatal units in**  
4 **the UK and Malaysia: a prospective observational study**  
5  
6  
7

8 Haslina Binti Abdul Hamid<sup>1,2</sup>, Lisa Szatkowski<sup>1</sup>, Helen Budge<sup>1</sup>, Fook Choe Cheah<sup>3</sup>,

9  
10 Shalini Ojha<sup>1,4</sup>  
11

12  
13  
14 **Corresponding author:** Shalini Ojha  
15

16 Room 4117, Medical School Building, Royal Derby Hospital, Derby, DE23 3DT.  
17

18 Email: [shalini.ojha@nottingham.ac.uk](mailto:shalini.ojha@nottingham.ac.uk)  
19

20 Telephone: +44 1332 724691  
21  
22

23  
24 Haslina Binti Abdul Hamid  
25

26 <sup>1</sup>Population and Lifespan Sciences, School of Medicine, University of Nottingham,  
27

28 UK  
29

30 <sup>2</sup>Dietetic Programme, Faculty of Health Sciences, Universiti Kebangsaan Malaysia,  
31

32 50300 Kuala Lumpur  
33  
34

35  
36 Lisa Szatkowski  
37

38 <sup>1</sup>Population and Lifespan Sciences, School of Medicine, University of Nottingham,  
39

40 UK  
41  
42

43  
44 Helen Budge  
45

46 <sup>1</sup>Population and Lifespan Sciences, School of Medicine, University of Nottingham,  
47

48 UK  
49  
50

51  
52 Fook Choe Cheah  
53

54 <sup>3</sup>Department of Paediatrics, Faculty of Medicine, Universiti Kebangsaan Malaysia,  
55

56 56000 Kuala Lumpur  
57  
58  
59  
60

1  
2  
3  
4  
5  
6  
7  
8  
9  
10  
11  
12  
13  
14  
15  
16  
17  
18  
19  
20  
21  
22  
23  
24  
25  
26  
27  
28  
29  
30  
31  
32  
33  
34  
35  
36  
37  
38  
39  
40  
41  
42  
43  
44  
45  
46  
47  
48  
49  
50  
51  
52  
53  
54  
55  
56  
57  
58  
59  
60

Shalini Ojha

<sup>1</sup>Population and Lifespan Sciences, School of Medicine, University of Nottingham,

UK

<sup>4</sup>Neonatal Unit, University Hospitals of Derby and Burton, Derby, DE23 3DT

Word Count: 2485

Key words: infant, preterm, nutrition, growth

Confidential: For Review Only

**ABSTRACT**

**Objective** To compare nutritional practices among preterm infants in neonatal units in Malaysia and the UK and assess the association with weight changes at discharge.

**Design** Prospective observational study of infants born <34 weeks gestational age (GA).

**Setting** Two neonatal units, one in Malaysia and one in the UK.

**Methods** Nutrition and growth data were collected from birth between May 2019 to March 2020 and compared between units. Factors associated with changes in weight-for-age Z-score (WAZ) at discharge were analysed.

**Results** From 100 infants included, median GA (IQR) was 31(30-33) and mean±SD birthweight was 1549±444g. Malaysian infants were smaller and had more morbidities. More of them received fortified breastmilk and parenteral nutrition with higher protein intake (mean±SD Malaysia: 3.0±0.5 vs UK: 2.7±0.6g/kg/d, p=0.004) in weeks 1-4 and had smaller cumulative protein deficits (mean±SD Malaysia: 11.4±6.1 vs UK: 15.4±8.0g/kg, p=0.006). More than half of the infants in both units had >-1.28 changes in WAZ at discharge (p=0.841). Length of stay was negatively associated with changes in WAZ in Malaysian infants (adjusted  $\beta$  of -0.01, p<0.001). In the UK unit, protein and protein energy ratio were positively associated with changes in WAZ (adjusted  $\beta$  of 0.36 and 0.34, p=0.004 and 0.027).

**Conclusions** There were differences in patient characteristics, nutritional practices and intakes. Weight changes among Malaysian infants were influenced by non-nutritional factors despite numerically sufficient intakes. In the UK, low protein intakes affected weight. Nutritional recommendations should take local demographics into consideration and optimising intakes should be prioritised.

**Word count: 247**

**What is already known on this topic**

1. There is a high rate of postnatal growth failure among preterm infants in neonatal units worldwide.
2. Varied nutritional practices such as parenteral nutrition and protein intakes are independent predictors of the growth outcomes of preterm infants at discharge.
3. Preterm infants' co-morbidities which possibly lead to longer hospital stay might be associated with growth failure at discharge.

**What this study adds**

1. Protein deficits are independently associated with growth failure at discharge.
2. Infants who are at-risk of severe co-morbidities need different targets for recommended nutrient intake.
3. Demographic and nutritional practice differences influencing the occurrence of postnatal growth failure in preterm infants between the countries with upper- middle- and high-incomes

## INTRODUCTION

Growth is one of the most important outcomes in determining the well-being of a preterm infant (1), and provision of optimal nutrition is a modifiable independent factor that could facilitate growth (2). Recommendations such as early initiation of parenteral nutrition (PN) and enteral nutrition (EN), shorter time in reaching full enteral feeding and the use of breast milk fortifier (BMF) may optimise growth outcomes in preterm infants (3). However, it is uncertain whether similar recommendations can be applied to different settings in which preterm infants are cared for. Factors such as clinical traditions and resource limitations in hospitals may influence the adoption of effective feeding practices (4). Internationally, nutritional recommendations (5,6) have been created and studied for preterm populations in the UK (7), USA (8) and other high-income settings (9). However, there is a paucity of studies in this area among low- and middle-income countries, despite the growing availability of neonatal intensive care in these settings. This study compares nutritional practices in a neonatal unit in Malaysia, as a lower income setting, with one in the UK. Secondly, the study investigates the association between the nutritional practices and postnatal growth in both units.

## METHODS

The study was carried out in the neonatal units of the Royal Derby Hospital, UK and the Hospital Canselor Tuanku Muhriz, Malaysia, from May 2019 to March 2020. The UK unit is a Local Neonatal Unit (level II) (10) routinely caring for infants born at >25 weeks GA. More immature infants and those requiring surgical care are transferred to appropriate centres. The Malaysia unit is a tertiary neonatal unit (level IIIb) (11) which also provides surgical support on-site (except for cardiac surgery). The two units have a similar number of preterm infant admissions (30-50 infants/month), number of beds and level of specific care in the unit. In RDH, the neonatal unit has 24 neonatal cots and caters to 6000-7000 birth per year, while in HCTM, its

1  
2  
3 neonatal unit has 26 cots and also caters to approximately 6000 birth per year. With  
4 an exception for not providing inhouse surgical support in the UK unit, both units  
5 provide similar types of care which comprises of care for the stable to intensive care  
6 infants. Both hospitals follow similar discharge criteria including weight of at least  
7 1800g, not needing any additional medical support, and fully milk fed.  
8  
9  
10  
11  
12

13  
14  
15  
16 Infants <34 weeks' GA who were admitted to either unit were recruited  
17 consecutively and followed to discharge until the sample size of 50 was reached at  
18 each site. Infants were included if admitted within 24 hours of birth, not transferred  
19 out for any part of their care and had length of stay of  $\geq 14$  days. Infants with major  
20 congenital anomalies, genetic abnormalities or missing records for  $\geq 3$  days were  
21 excluded. The number of infants included was determined based on the usual  
22 monthly admissions and length of stay at the respective units which was estimated  
23 to be from 30 to 50 infants. Therefore, collection of data from 50 infants from each  
24 unit (total of 100) was deemed to be feasible within the time available for the study.  
25  
26  
27  
28  
29  
30  
31  
32  
33  
34

35  
36  
37 Anonymised data were extracted from paper or electronic medical records  
38 (accessed from BadgerNet (Client version 2.9.1.0) in the UK, and the Caring  
39 Hospital Enterprise System (C-HETs) in Malaysia).  
40  
41  
42  
43  
44

#### 45 **Baseline and feeding data**

46  
47 Infant and maternal characteristics including sex, GA at birth, maternal age, and  
48 parity as well as infants' clinical characteristics were collected prospectively. Daily  
49 nutritional intakes including parenteral nutrition (PN) and enteral nutrition (EN) were  
50 recorded. Volume of breast milk intakes were recorded only from bottle-feeding  
51 (expressed breast milk) as units do not routinely record before and after feeding  
52 weight for direct breastfeeding. The nutritional content of EN and PN were  
53 calculated based on the manufacturers' literature while the composition of breast  
54  
55  
56  
57  
58  
59  
60



1  
2  
3 milk was based on current evidence (12). Nutrient deficits were calculated as the  
4 difference between actual intake and the minimum intake recommended by  
5 ESPGHAN (2010) guidelines (5).  
6  
7  
8  
9

10  
11 Similar feeding protocols are used in both units. Generally, minimal enteral feeding  
12 (5-15ml/kg/d) is started within the first 24 hours. The units have guidelines on  
13 advancing feeds, promoting the use of mother's milk and the use of breast milk  
14 fortification and micronutrient supplementation.  
15  
16  
17  
18  
19

### 20 21 22 **Growth measures**

23  
24 Fenton growth chart (13) was used as a reference for all growth assessments in  
25 both units in determining Z-scores. It was chosen for this study for its advantage of  
26 using more recent and larger sample of preterm infants' data from many countries  
27 which link to the WHO growth data. In this study, only weight and head  
28 circumference (HC) measurements were assessed, as length is not routinely  
29 measured in the UK unit.  
30  
31  
32  
33  
34  
35  
36  
37  
38

39 The marker for growth used in this study is the change in weight-for-age Z-scores  
40 (WAZ) from birth to discharge which was determined by subtracting the WAZ at  
41 birth from the WAZ at discharge. This was used due to the better sensitivity of  
42 weight than HC measurements in determining short term growth and Z-score as the  
43 best system for presentation and evaluation of anthropometric data (14) especially  
44 in indicating change over time. Postnatal growth failure was defined as a decrease  
45 in WAZ between birth and discharge of  $\geq 1.28$  as used in previous studies (15,16).  
46  
47  
48  
49  
50 SGA was defined as birth weight  $< 10^{\text{th}}$  centile for birth weight (17).  
51  
52  
53  
54  
55  
56  
57  
58  
59  
60

### Statistical analysis

All statistical analyses were performed using STATA 16.0 (Stata Corp. College Station, TX). Descriptive statistics were used to summarise the demographic and clinical characteristics of infants and their mothers. Infants' EN, PN and combined intakes in weeks 1-4 and weeks 5-8 and the cumulative deficits accrued in this period were analysed. Growth outcomes and other variables collected at discharge were also compared. The characteristics of infants and mothers, feeding practices as well as growth outcomes in the UK and Malaysia cohorts were compared using the Student's t-test or Mann-Whitney U test for continuous variables and by Chi squared or Fisher's exact tests for categorical variables, as appropriate. Mean or median difference and 95% confidence intervals were calculated for nutritional intakes and growth outcomes value comparison between sites.

Univariable analyses were used to explore factors that predicted changes in WAZ separately for each unit. In the exploratory analysis, variables with missing data such as intakes on weeks 5-8 for infants who were discharged before this period were excluded. Given the small sample size, clinical conditions where fewer than 10 babies experienced that outcome were also excluded. Variables which were statistically significant at the 5% significance level in the univariable analysis or those considered clinically important, were entered into a multivariable model. Likelihood ratio tests were used to build a final parsimonious multivariable model. Collinearity between variables was assessed using the variance inflation factor (VIF) with a VIF of less than 5 taken to indicate no substantial collinearity (18).

### Regulatory approvals

Ethical approval was obtained from the Health Research Authority (HRA) and Health and Care Research Wales (HCRW) Approval (United Kingdom) [IRAS project ID: 258817, Protocol number: 19012] and Research Ethics Committee,

1  
2  
3 National University of Malaysia, UKM (Malaysia) [JEP-2019-325]. No parental  
4 consent was sought as this was an observational study using routinely recorded  
5 clinical data.  
6  
7  
8  
9

### 10 11 12 13 **Patient and Public Involvement**

14 Patients or the public were not involved in the design, conduct, reporting or  
15 distribution plans of our study.  
16  
17  
18  
19

### 20 21 **RESULTS**

22 In this study, infants in Malaysia and the UK units were of similar GA, but Malaysian  
23 infants were lighter and had a lower WAZ and length-for-age Z-scores at birth  
24 although the HC Z-scores were not different (Table 1). There were more SGA  
25 infants in Malaysia (12/50; 24%) compared to the UK unit (3/50; 6%) (p=0.039). In  
26 Malaysia unit, there were fewer multiple births, more morbidities, mothers were  
27 older and had had more previous births (Table 1).  
28  
29  
30  
31  
32  
33  
34  
35  
36  
37

### 38 **Enteral feeding**

39 Milk feeding was started on median day of life (DOL) of 2 (p=0.833) in both units.  
40 Full milk feeds (defined as 150 ml/kg/day EN with no PN) was reached on median  
41 (IQR) DOL 9 (7-12) in Malaysia and DOL 8 (7-10) in the UK, p=0.400 (Table 2).  
42  
43  
44  
45  
46  
47

48 More infants in Malaysia received any mother's own milk (MOM) during admission  
49 (Malaysia: 98% vs UK: 76%, p=0.001) and more infants in the UK received formula  
50 milk (Malaysia: 80% vs. UK: 94%, p=0.037). Among infants who were fed their  
51 MOM, 86% infants had BMF added on median (IQR) DOL 11 (8-16) in Malaysia  
52 when they were receiving a median (IQR) milk volume of 154 (149-164) ml/kg/d  
53 while 26% infants had BMF added on median (IQR) DOL 15 (10-20) at median  
54  
55  
56  
57  
58  
59  
60

1  
2  
3 (IQR) milk volume of 157 (132-167) ml/kg/d,  $p=0.655$  in the UK. At discharge, 52%  
4  
5 infants were exclusively breast milk-fed in Malaysia compared to 32% in the UK  
6  
7 ( $p=0.043$ ) (Table 2).  
8  
9

### 10 11 **Parenteral feeding**

12  
13 40 (80%) infants received PN in Malaysia compared to 19 (38%) in the UK. PN was  
14  
15 started on a median DOL 2 in both units ( $p=0.414$ ) but was given for longer in  
16  
17 Malaysia than in the UK (median (IQR) days of PN in Malaysia: 9 (6-14) vs. UK: 6  
18  
19 (5-8),  $p=0.031$  (Table 2).  
20  
21  
22

### 23 24 **Nutritional intakes**

25  
26 There was no significant difference in energy intakes in weeks 1-4 between the two  
27  
28 units ( $p=0.238$ ). However, Malaysian infants received more protein (Malaysia:  
29  
30  $3.0\pm 0.5$  g/kg/d vs UK:  $2.7\pm 0.6$  g/kg/d,  $p=0.004$ ) and had smaller cumulative energy  
31  
32 and protein deficits over this period, than the UK infants (Malaysia (energy):  
33  
34  $191.6\pm 129.8$  vs UK:  $254.5\pm 152.0$  kcal/kg,  $p=0.028$  and Malaysia (protein):  $11.4\pm 6.1$   
35  
36 vs UK:  $15.4\pm 8.0$ g/kg,  $p=0.006$ ). Protein energy ratio (PER) was also higher in the  
37  
38 Malaysia unit (Malaysia:  $3.03\pm 0.31$  g/100kcal/d vs. UK:  $2.61\pm 0.48$  g/100kcal/d,  
39  
40  $p<0.001$ ) (Table 2).  
41  
42  
43  
44

45  
46 For those infants who remained in the hospital in weeks 5-8 of life (Malaysia:  $n=28$ ,  
47  
48 UK:  $n=23$ ), better energy intakes were shown in both units although energy deficits  
49  
50 in the UK cohort persisted. No significant difference in protein intakes was found  
51  
52 between units but cumulative protein deficits in Malaysian infants improved while  
53  
54 the magnitude of the deficit worsened in UK infants (Malaysia:  $8.7\pm 11.8$  g/kg vs UK:  
55  
56  $24.5\pm 25.6$  g/kg,  $p=0.005$ ).  
57  
58  
59

### 60 **Postnatal growth**

1  
2  
3 There were no significant differences in growth outcomes at discharge between  
4 infants from the two units (Table 3). WAZ declined by  $\geq 1.28$  in 52% and 54% of  
5 infants in Malaysia and the UK, respectively. The mean $\pm$ SD change in WAZ  
6 between birth and discharge was similar between the two cohorts (Malaysia: -  
7 1.31 $\pm$ 0.57; UK: -1.33  $\pm$ 0.58;  $p=0.975$ ) (Table 3).  
8  
9  
10  
11  
12  
13  
14  
15  
16  
17

### 18 **Factors associated with change in WAZ from birth to discharge**

19  
20 In Malaysia, in univariable analyses, birthweight, HC and length at birth, GA at birth,  
21 being very/extremely preterm/low birthweight, length of stay, diagnosis of IVH and  
22 CLD, the use of IV fluid, PN, duration of PN, and DOL to reach full feed and first  
23 BMF use, were associated with changes in WAZ at discharge. After adjustment, the  
24 final multivariable regression model showed that length of stay was the only  
25 predictor that remained significant, showing negative changes in WAZ with longer  
26 hospital stay (adjusted  $\beta$  of -0.01,  $p<0.001$ , adjusted  $R^2$  of 0.35) (Table 4).  
27  
28  
29  
30  
31  
32  
33  
34  
35  
36

37 In the UK, birthweight Z-score, mother's age, length of stay, protein intake in weeks  
38 1-4, PER in weeks 1-4 and DOL reaching full enteral feeds, were significant in  
39 univariable models and remained so in the multivariable model (adjusted  $R^2$  of  
40 0.62). Of these variables, protein intakes and PER weeks 1-4 showed positive  
41 association with growth at discharge, indicating improved changes in WAZ with  
42 higher intakes of protein and PER in weeks 1-4 (Table 4).  
43  
44  
45  
46  
47  
48  
49  
50  
51  
52  
53  
54  
55  
56  
57  
58  
59  
60

## DISCUSSION

The study found that more Malaysian infants received breast milk as compared to UK infants. This is consistent with each countries' national reports (19,20) that record a higher rate of breastfeeding among Malaysian infants. The higher rate of breastmilk feeding among Malaysian infants is possibly related to older maternal age and higher parity among mothers, as shown in many studies (21,22). The Malaysian unit has an established accreditation as Baby Friendly Hospital (BFH) (23) which is favourably related to the high rate of initiation and continuation of breastfeeding (24,25). The UK unit has achieved stage 1 of BFI accreditation and is building towards a stage 2 (26).

More Malaysian infants received PN which could be related to more SGA infants and higher rates of co-morbidities in this unit where clinicians are more likely to give PN to enhance nutrition. Infants in the UK unit were larger and less unwell and hence more likely to establish enteral feeding and avoid initial or prolonged need for PN. Furthermore, more BMF use and higher use of protein supplementation were also practiced in Malaysia unit, while BMF was used more selectively in the UK unit. The more frequent and longer use of PN and BMF resulted in differences in nutrient intakes particularly where Malaysian infants had higher protein intakes, lower cumulative deficits and earlier recovery of deficits. Additionally, any change to feeding strategies for the individual infants would also, understandably, be a response to infants' clinical conditions which might not be detected in this study.

Despite the differences in intakes, weight changes were similar in both units. Hospital stay was shown to be the only predictor for WAZ changes at discharge for Malaysian infants. This may be due to smaller infants with greater burden of illnesses have longer stay and sub-optimal growth (27,28) while larger, healthier infants are more likely to be discharged earlier. In addition, more aggressive

1  
2  
3 nutritional practices are practiced in Malaysia unit, enabling faster weight gain  
4 among clinically stable infants. This is to encourage earlier discharge due to limited  
5 space and resources in the unit, while sicker infants stay longer.  
6  
7  
8  
9

10  
11 However, hospital stay accounted for only 35% of variation in changes in WAZ in  
12 this cohort. The remaining unexplained variation could be a combination of several  
13 other underlying factors. For example, this study shows that Malaysian infants were  
14 generally lighter and shorter than infants in the UK. This could be attributed to  
15 genetic influence (29) and generally higher rates of LBW in Malaysian infants as  
16 previously reported (30). However, there is a possibility that these differences are  
17 not entirely genetic and factors such as maternal and in-utero undernutrition  
18 underlie the smaller size at birth especially as there was no significant difference  
19 observed in HC between the two units (31).  
20  
21  
22  
23  
24  
25  
26  
27  
28  
29  
30

31  
32 In the UK unit, protein intakes and PER, which accounted for the largest variation in  
33 changes in WAZ, have also been shown to affect postnatal growth in previous  
34 studies (9,32). Even though formula milk offers higher protein intakes than  
35 unfortified breast milk (33,34), MOM is the optimal food for preterm infants and can  
36 be fortified when needed. Nearly half of the infants in this cohort received a mix of  
37 formula milk (2.0-2.6g protein/100ml) and unfortified breast milk (1.3-1.9 g  
38 protein/100ml). However, as a group, they did not achieve the recommended intake  
39 at 3.5 g/kg/d. Previous studies show that protein intakes aimed at >3.5-3.8 g/kg/d  
40 led to decreased cumulative deficits and better growth (35,36). Fortifying breast milk  
41 in more infants would increase protein intake although this would also involve using  
42 a cow's milk product and interfere with the exclusive breast milk feeding at least in  
43 some infants.  
44  
45  
46  
47  
48  
49  
50  
51  
52  
53  
54  
55  
56  
57  
58  
59  
60

1  
2  
3 Despite notable differences in intake, there were no significant differences in the  
4 short-term growth at discharge between the units. The differences in infant  
5 characteristics, possibly co-morbidities may explain this. Therefore, with this data, it  
6 would be pertinent to re-evaluate if the current nutritional recommendations (5) used  
7 should be similarly applied for all preterm infants considering the heterogeneity in  
8 intrauterine growth and co-morbidities that might affect growth. Besides, pushing for  
9 more aggressive nutrition to achieve target weights should be considered with  
10 caution, as 'optimal growth' outcome should also include longer-term growth and the  
11 neurodevelopmental and metabolic outcomes in later life. Studies show that preterm  
12 infants fed mainly breast milk have slower weight gain but show better  
13 neurodevelopmental outcomes (37,38).  
14  
15  
16  
17  
18  
19  
20  
21  
22  
23  
24  
25  
26  
27  
28  
29  
30  
31  
32  
33  
34  
35  
36  
37  
38  
39  
40  
41  
42  
43  
44  
45  
46  
47  
48  
49

The strengths of this study are that it is a two-centre cohort study with detailed daily actual nutritional intake and weekly growth data collected prospectively. However, the study is limited to a small number of infants and a larger sample size is needed to further evaluate reasons for growth failure. Maternal details including nutritional status and antenatal care should also be considered as these are vital determinants of fetal nutrition and infants' outcomes (39). Also, the predominant use of breastmilk, especially in Malaysian cohort, means that intakes were analysed by using the best available estimates (12) and may not reflect the true nutritional composition of the milk received.

## 50 **CONCLUSION**

51 There was variation in nutritional practices between these two units in the UK and  
52 Malaysia. Current nutritional practices often do not meet recommended intakes,  
53 especially protein in preterm infants. Early use of PN and EN with fortified breast  
54 milk may improve nutrient intakes. Some demographic factors and nutritional  
55 practice differences affecting the high prevalence of postnatal growth failure in both  
56  
57  
58  
59  
60



1  
2  
3 units were identified. More efforts are needed to produce evidence-based nutritional  
4  
5 intake recommendations for settings that care for a large number of smaller or  
6  
7 sicker infants.  
8  
9  
10  
11  
12  
13  
14  
15  
16  
17  
18  
19  
20  
21  
22  
23  
24  
25  
26  
27  
28  
29  
30  
31  
32  
33  
34  
35  
36  
37  
38  
39  
40  
41  
42  
43  
44  
45  
46  
47  
48  
49  
50  
51  
52  
53  
54  
55  
56  
57  
58  
59  
60

Confidential: For Review Only

**Acknowledgements** We would like to acknowledge the support of all the staff at Royal Derby Hospital and Hospital Canselor Tuanku Muhriz neonatal units for their assistance during the data collection process of this study. We also would like to acknowledge Janine Abramson and Coral Smith who assisted in the electronic data collection in the UK unit, Drs Cho Cho Latt and Tian-Lee Tan for the data collection in Malaysia unit.

**Contributors** HAH, SO, LS, HB and FCC conceptualised and designed the study and reviewed and revised the manuscript. HAH performed the data collection in the UK unit, completed the data analysis and drafted the initial manuscript. All authors approved the final manuscript as submitted and agree to be accountable for all aspects of the work.

**Funding** HAH is supported by a PhD scholarship from the Ministry of Higher Education Malaysia and Universiti Kebangsaan Malaysia (UKM).

**Competing interests** None declared.

**Patient consent** Not required.

**Provenance and peer review** Yes

## References

1. Young A, Andrews ET, Ashton JJ, Pearson F, Beattie RM, Johnson MJ. Generating longitudinal growth charts from preterm infants fed to current recommendations. *Arch Dis Child - Fetal Neonatal Ed.* 2020 Nov;105(6):646–51.
2. Stoltz Sjöström E, Öhlund I, Ahlsson F, Engström E, Fellman V, Hellström A, et al. Nutrient intakes independently affect growth in extremely preterm infants: Results from a population-based study. *Acta Paediatr Int J Paediatr.* 2013;102(11):1067–74.
3. Maas C, Poets CF, Franz AR. Avoiding postnatal undernutrition of vlbw infants during neonatal intensive care: Evidence and personal view in the absence of evidence. *Arch Dis Child Fetal Neonatal Ed.* 2015;100(1):F76–81.
4. de Waard M, Li Y, Zhu Y, Ayede AI, Berrington J, Bloomfield FH, et al. Time to Full Enteral Feeding for Very Low-Birth-Weight Infants Varies Markedly Among Hospitals Worldwide But May Not Be Associated With Incidence of Necrotizing

- 1  
2  
3 Enterocolitis: The NEOMUNE-NeoNutriNet Cohort Study. *J Parenter Enter Nutr.* 2018;  
4  
5  
6  
7 5. Agostoni C, Buonocore G, Carnielli VP, De Curtis M, Darmaun D, Decsi T, et al.  
8 Enteral nutrient supply for preterm infants: Commentary from the European  
9 society of paediatric gastroenterology, hepatology and nutrition committee on  
10 nutrition. *J Pediatr Gastroenterol Nutr.* 2010;50(1):85–91.  
11  
12 6. Koletzko B, Poindexter B, Uauy R. *Nutrition of the preterm infant: Scientific*  
13 *Basis and Practical Guidelines.* Basel: Karger; 2014.  
14  
15 7. Andrews ET, Ashton JJ, Pearson F, Mark Beattie R, Johnson MJ. Early  
16 postnatal growth failure in preterm infants is not inevitable. *Arch Dis Child Fetal*  
17 *Neonatal Ed.* 2018;10–2.  
18  
19 8. Horbar JD, Ehrenkranz RA, Badger GJ, Edwards EM, Morrow KA, Soll RF, et al.  
20 *Weight Growth Velocity and Postnatal Growth Failure in Infants 501 to 1500*  
21 *Grams: 2000-2013.* *Pediatrics.* 2015;136(1):e84–92.  
22  
23 9. Cormack BE, Jiang Y, Harding JE, Crowther CA, Bloomfield FH. Relationships  
24 between Neonatal Nutrition and Growth to 36 Weeks' Corrected Age in ELBW  
25 Babies—Secondary Cohort Analysis from the Provide Trial. *Nutrients.* 2020 Mar  
26 13;12(3):760.  
27  
28 10. British Association of Perinatal Medicine (BAPM) (2010). *Service standards for*  
29 *hospitals providing neonatal care, 3rd edition.* [Internet]. 2010. Available from:  
30 [http://www.bapm.org/publications/documents/guidelines/BAPM\\_Standards\\_Final\\_Aug2010.pdf](http://www.bapm.org/publications/documents/guidelines/BAPM_Standards_Final_Aug2010.pdf)  
31  
32  
33 11. Ministry of Health Malaysia. *The Operational Policy for Paediatric Services.* the  
34 *Medical Services Development Section;* 2012.  
35  
36 12. Gidrewicz DA, Fenton TR. A systematic review and meta-analysis of the nutrient  
37 content of preterm and term breast milk. *BMC Pediatr.* 2014 Aug 30;14:216.  
38  
39 13. Fenton T, Kim J. A systematic review and meta-analysis to revise the Fenton  
40 growth chart for preterm infants. *BMC Pediatr.* 2013;13:59.  
41  
42 14. Geneva: World Health Organization. *Physical status: the use and interpretation*  
43 *of anthropometry. Report of a WHO Expert Committee. WHO Technical Report*  
44 *Series No. 854.* 1995.  
45  
46 15. Lin Z, Green RS, Chen S, Wu H, Liu T, Li J, et al. Quantification of EUGR as a  
47 measure of the quality of nutritional care of premature infants. *PLoS ONE.*  
48 2015;10(7):1–10.  
49  
50 16. Lee SM, Kim N, Namgung R, Park M, Park K, Jeon J. Prediction of Postnatal  
51 Growth Failure among Very Low Birth Weight Infants. *Sci Rep.* 2018;8(1):1–8.  
52  
53 17. Darmaun D, Lapillonne A, Simeoni U, Picaud J-C, Rozé J-C, Saliba E, et al.  
54 Parenteral nutrition for preterm infants: Issues and strategy. *Arch Pediatr*  
55 *Organe Off Soc Francaise Pediatr.* 2018 May;25(4):286–94.  
56  
57 18. Kim J. Multicollinearity and misleading statistical results. *Korean J Anesthesiol.*  
58 2019 Dec 1;72(6):558–69.  
59  
60

19. Institute for Public Health. The National Health and Morbidity Survey (NHMS) 2016 [Internet]. Kuala Lumpur: Institute for Public Health, National Institutes of Health, Ministry of Health Malaysia; 2016. Available from: <http://iku.moh.gov.my/images/IKU/Document/REPORT/2016/NHMS2016ReportVolumell-MaternalChildHealthFindingsv2.pdf>
20. NHS Maternity Statistics, England 2017-18. Maternity and Breastfeeding [Internet]. Available from: <https://www.england.nhs.uk/statistics/statistical-work-areas/maternity-and-breastfeeding/>
21. Casey PH, Whiteside-Mansell L, Barrett K, Bradley RH, Gargus R. Impact of prenatal and/or postnatal growth problems in low birth weight preterm infants on school-age outcomes: an 8-year longitudinal evaluation. *Pediatrics*. 2006 Sep;118(3):1078–86.
22. Bonnet C, Blondel B, Piedvache A, Wilson E, Bonamy AE, Gortner L, et al. Low breastfeeding continuation to 6 months for very preterm infants: A European multiregional cohort study. *Matern Child Nutr* [Internet]. 2019 Jan [cited 2021 Feb 15];15(1). Available from: <https://onlinelibrary.wiley.com/doi/abs/10.1111/mcn.12657>
23. Ministry of Health Malaysia. National Breastfeeding Policy 2005 [Internet]. 2005. Available from: <http://nutrition.moh.gov.my/wp-content/uploads/penerbitan/poster/polisi%20penyusuan%20ibu.jpg>
24. Spaeth A, Zemp E, Merten S, Dratva J. Baby-Friendly Hospital designation has a sustained impact on continued breastfeeding. *Matern Child Nutr*. 2018 Jan;14(1):e12497.
25. Broadfoot M, Britten J, Tappin DM, MacKenzie JM. The Baby Friendly Hospital Initiative and breast feeding rates in Scotland. *Arch Dis Child Fetal Neonatal Ed*. 2005 Mar;90(2):F114-116.
26. UNICEF UK. Accreditation [Internet]. 2019. Available from: <https://www.unicef.org.uk/babyfriendly/accreditation/>
27. Maier RF, Blondel B, Piedvache A, Misselwitz B, Petrou S, Van Reempts P, et al. Duration and Time Trends in Hospital Stay for Very Preterm Infants Differ Across European Regions\*: *Pediatr Crit Care Med*. 2018 Dec;19(12):1153–61.
28. Zainal H, Dahlui M, Soelar SA, Su TT. Cost of preterm birth during initial hospitalization: A care provider's perspective. *Isangula KG, editor. PLOS ONE*. 2019 Jun 25;14(6):e0211997.
29. Chen ST. Growth chart based on longitudinal study of Malaysian children from birth to six years. *Med J Malays*. 1985 Jun;40(2).
30. United Nations Children's Fund (UNICEF), World Health Organization (WHO). UNICEF-WHO Low birthweight estimates: Levels and trends 2000–2015 [Internet]. Geneva: World Health Organization; 2019. Available from: <https://apps.who.int/iris/bitstream/handle/10665/324783/WHO-NMH-NHD-19.21-eng.pdf?ua=1>

- 1  
2  
3 31. Fleiss B, Wong F, Brownfoot F, Shearer IK, Baud O, Walker DW, et al.  
4 Knowledge Gaps and Emerging Research Areas in Intrauterine Growth  
5 Restriction-Associated Brain Injury. *Front Endocrinol.* 2019 Mar 29;10:188.  
6
- 7 32. Fenton TR, Al-Wassia H, Premji SS, Sauve RS. Higher versus lower protein  
8 intake in formula-fed low birth weight infants. *Cochrane Neonatal Group, editor.*  
9 *Cochrane Database Syst Rev* [Internet]. 2020 Jun 23 [cited 2020 Oct 21];  
10 Available from: <http://doi.wiley.com/10.1002/14651858.CD003959.pub4>  
11
- 12 33. Schanler RJ, Shulman RJ, Lau C, Smith EO, Heitkemper MM. Feeding  
13 strategies for premature infants: randomized trial of gastrointestinal priming and  
14 tube-feeding method. *Pediatrics.* 1999 Feb;103(2):434–9.  
15
- 16 34. Carlson SJ, Ziegler EE. Nutrient intakes and growth of very low birth weight  
17 infants. *J Perinatol Off J Calif Perinat Assoc.* 1998 Aug;18(4):252–8.  
18
- 19 35. Senterre T, Rigo J. Reduction in postnatal cumulative nutritional deficit and  
20 improvement of growth in extremely preterm infants. *Acta Paediatr Int J*  
21 *Paediatr.* 2012;101(2):64–70.  
22
- 23 36. Embleton NE, Pang N, Cooke RJ. Postnatal Malnutrition and Growth  
24 Retardation: An Inevitable Consequence of Current Recommendations in  
25 Preterm Infants? *Pediatrics.* 2001;107(2):270–3.  
26
- 27 37. Rozé J-C, Darmaun D, Boquien C-Y, Flamant C, Picaud J-C, Savagner C, et al.  
28 The apparent breastfeeding paradox in very preterm infants: relationship  
29 between breast feeding, early weight gain and neurodevelopment based on  
30 results from two cohorts, EPIPAGE and LIFT. *BMJ Open.* 2012 Jan  
31 1;2(2):e000834.  
32
- 33 38. Vohr BR, Poindexter BB, Dusick AM, McKinley LT, Higgins RD, Langer JC, et  
34 al. Persistent beneficial effects of breast milk ingested in the neonatal intensive  
35 care unit on outcomes of extremely low birth weight infants at 30 months of age.  
36 *Pediatrics.* 2007 Oct;120(4):e953-959.  
37
- 38 39. McCowan L, Roberts C, Dekker G, Taylor R, Chan E, Kenny L, et al. Risk  
39 factors for small-for-gestational-age infants by customised birthweight centiles:  
40 data from an international prospective cohort study: Risk factors for SGA infants  
41 by customised centiles. *BJOG Int J Obstet Gynaecol.* 2010 Dec;117(13):1599–  
42 607.  
43  
44  
45  
46  
47  
48  
49  
50  
51  
52  
53  
54  
55  
56  
57  
58  
59  
60

## Tables

Table 1: Infant and maternal characteristics of infants born at <34 weeks' gestational age and cared for in a neonatal unit in Malaysia and one in the UK

| Variables                                     | Infants in the Malaysian unit<br>n=50 | Infants in the UK unit<br>n=50     | p-value |
|-----------------------------------------------|---------------------------------------|------------------------------------|---------|
| Female, n (%)                                 | 21 (42)                               | 22 (44)                            | 0.84    |
| Gestational age at birth (weeks) median (IQR) | 32 (29-32, 25-33)                     | 31 (30-33, 26-33)                  | 0.736   |
| Birthweight (grams) mean (SD)                 | 1448 (458)                            | 1649 (409)                         | 0.022   |
| Birthweight-for-age z-score mean (SD)         | -0.53 (0.93)                          | -0.10 (0.70)                       | 0.009   |
| Small for gestational age, n (%)              | 12 (24)                               | 3 (6)                              | 0.012   |
| HC at birth (cm), mean (SD)                   | 28 (2.68)                             | 28.9 (2.35)                        | 0.106   |
| HC-for-age z-score at birth Mean (SD)         | -0.26 (-0.98 to 0.59, -4.2 to 2.05)   | 0.06 (-0.57 to 0.59, -3.3 to 1.54) | 0.310   |
| Length at birth (cm) mean (SD)                | 38.4 (3.65)                           | 41.9 (4.08)                        | <0.001  |
| Length at birth-for-age z-score mean (SD)     | -0.92 (1.05)                          | 0.21(1.23)                         | <0.001  |
| Singleton birth, n (%)                        | 45 (90)                               | 34 (68)                            | 0.007   |
| Mother's age (years) mean (SD)                | 32 (5)                                | 29 (5)                             | 0.009   |
| Parity, median (IQR)                          | 3 (1-4, 1-8)                          | 0 (0-1, 0-6)                       | <0.001  |
| Caesarean section, n (%)                      | 37 (74)                               | 32 (64)                            | 0.280   |
| Apgar score at 5 minutes, median (IQR)        | 9 (8-10, 3-10)                        | 9 (9, 6-10)                        | 0.844   |
| Antenatal steroid use, n (%)                  | 47 (94)                               | 42 (84)                            | 0.194   |
| Received positive pressure ventilation, n (%) | 21 (42)                               | 27 (54)                            | 0.230   |
| Late onset sepsis (confirmed), n (%)          | 13 (26)                               | 4(8)                               | <0.001  |
| Necrotising enterocolitis (suspected), n (%)  | 6 (12)                                | 3 (6)                              | 0.243   |
| Intraventricular haemorrhage, n (%)           | 36 (72)                               | 2 (4)                              | <0.001  |
| Retinopathy of prematurity, n (%)             | 4 (8)                                 | 1 (2)                              | 0.181   |
| Periventricular leukomalacia, n (%)           | 7 (14)                                | 0                                  | 0.006   |
| Chronic lung disease, n (%)                   | 10 (20)                               | 3 (6)                              | 0.036   |
| Patent ductus arteriosus, n (%)               | 16 (32)                               | 6 (12)                             | 0.014   |

HC, head circumference; IQR, inter-quartile range; SD, standard deviation. P-values for comparisons between the two groups were determined by the Student's t-test or Mann-Whitney U test for continuous variables and by Chi squared or Fisher's exact tests for categorical variables, as appropriate.

Table 2: Feeding practices and nutritional intakes in infants born at <34 weeks' gestational age and cared for in a neonatal unit in Malaysia and one in the UK

| Variables, n (%)                                                      | Malaysian group<br>n=50 | UK group<br>n=50    | p-value |
|-----------------------------------------------------------------------|-------------------------|---------------------|---------|
| Received any breast milk                                              | 49 (98)                 | 38 (76)             | 0.001   |
| Any breast milk at discharge                                          | 46 (92)                 | 25 (50)             | <0.001  |
| Exclusively breast milk feeding at discharge                          | 26 (52)                 | 16 (32)             | 0.043   |
| Received infant formula milk                                          | 40 (80)                 | 47 (94)             | 0.037   |
| Energy proportion (%) from breast milk during admission**             | 66.5<br>(40-83)         | 15.5<br>(2-82)      | 0.010   |
| Energy proportion (%) from formula milk during admission <sup>‡</sup> | 19.2<br>(2.2-52.3)      | 78.8<br>(12.7-93.9) | <0.001  |
| Day of life at first enteral milk feed**                              | 2 (1-3)                 | 2 (1-2)             | 0.833   |
| Day of life reaching 120 mL/kg/d feed**                               | 4<br>(4-5)              | 5<br>(4-5)          | 0.044   |
| Day of life reaching full enteral feed at 150 ml/kg/d**               | 9<br>(7-12)             | 8<br>(7-10)         | 0.400   |
| Rate of feeding advancement to full feed**                            | 13 (6-16)               | 16 (9-20)           | 0.390   |
| Received breast milk fortifier                                        | 43 (86)                 | 13 (26)             | <0.001  |
| Day of life at first breast milk fortifier received <sup>‡</sup>      | 11<br>(8-16)            | 15<br>(10-20)       | 0.039   |
| Received parenteral nutrition                                         | 40 (80)                 | 19 (38)             | <0.001  |
| Day of life at first parenteral nutrition**                           | 2 (1-2)                 | 2 (1-2)             | 0.414   |
| Duration of parenteral nutrition**                                    | 9 (6-14)                | 6 (5-8)             | 0.031   |
| Energy intake, kcal/kg/d*                                             |                         |                     |         |
| Week 1-4                                                              | 103 (13)                | 100 (11)            | 0.238   |
| Week 5-8                                                              | 110 (18)                | 115 (15)            | 0.363   |
| Cumulative energy deficits/excess <sup>‡</sup> , kcal/kg*             |                         |                     |         |
| Week 1-4                                                              | -191.6 (129.8)          | -254.5 (152.0)      | 0.028   |
| Week 5-8                                                              | 93.2(237.4)             | -93.8 (539.3)       | 0.105   |
| Protein intake, g/kg/d*                                               |                         |                     |         |
| Week 1-4                                                              | 3.0 (0.5)               | 2.7 (0.6)           | 0.004   |
| Week 5-8                                                              | 3.4 (0.7)               | 3.0 (0.8)           | 0.088   |
| Cumulative protein deficits/excess <sup>‡</sup> , g/kg*               |                         |                     |         |
| Week 1-4                                                              | -11.4 (6.1)             | -15.4 (8.0)         | 0.006   |
| Week 5-8                                                              | -8.7 (11.8)             | -24.5 (25.6)        | 0.005   |
| Protein energy ratio, g/100 kcal/d*                                   |                         |                     |         |
| Week 1-4                                                              | 2.82 (0.28)             | 2.61 (0.48)         | 0.008   |
| Week 5-8                                                              | 3.03 (0.31)             | 2.57 (0.38)         | <0.001  |
| Fat intake, g/kg/d*                                                   |                         |                     |         |
| Week 1-4                                                              | 4.8 (0.7)               | 4.8 (0.6)           | 0.627   |
| Week 5-8                                                              | 5.3 (1.0)               | 5.8 (0.7)           | 0.058   |
| Carbohydrate intake, g/kg/d*                                          |                         |                     |         |
| Week 1-4                                                              | 11.4 (1.9)              | 10.7(1.4)           | 0.020   |
| Week 5-8                                                              | 11.9 (2.0)              | 12.2(1.7)           | 0.607   |
| Fluid intake, ml/kg/d*                                                |                         |                     |         |
| Week 1-4                                                              | 137.1 (12.9)            | 138.8 (10.9)        | 0.491   |
| Week 5-8                                                              | 141.4 (22.4)            | 153.9 (13.9)        | 0.024   |

\*\*Median (IQR); \* Mean (SD); <sup>‡</sup>Negative value indicates deficits. P-values for comparisons between the two groups were determined by the Student's t-test or Mann-Whitney U test for continuous variables and by Chi squared or Fisher's exact tests for categorical variables.

Table 3: Postnatal growth measurements in infants born at <34 weeks' gestational age and cared for in a neonatal unit in Malaysia and one in the UK

| Variables                                                                       | Malaysia<br>n=50          | UK<br>n=50               | MD<br>(95% CI)             | p-value |
|---------------------------------------------------------------------------------|---------------------------|--------------------------|----------------------------|---------|
| Days to regain birth weight**                                                   | 12<br>(11-14)             | 13<br>(10-16)            | -1 (-3.17 to 1.17)         | 0.247   |
| Maximum weight loss from birth weight (%) **                                    | 4.4 (1.9-7.5)             | 5.7 (2.5-9.4)            | -1.25 (-3.63 to 1.14)      | 0.275   |
| Weight (g) at discharge**                                                       | 2060<br>(1890-2390)       | 2165<br>(2050-2380)      | -105<br>(-252.02 to 42.02) | 0.221   |
| Weight Z-score at discharge**                                                   | -1.65<br>(-2.3 to -1.0)   | -1.3<br>(-1.8 to -0.80)  | -0.35<br>(-0.77 to 0.08)   | 0.088   |
| Changes in weight Z-score from birth to discharge*                              | -1.31<br>(0.57)           | -1.33<br>(0.58)          | 0.01<br>(-0.22 to 0.23)    | 0.975   |
| Infants with weight Z- score change $\geq$ -1.28 from birth to discharge, n (%) | 26 (52)                   | 27 (54)                  | -                          | 0.841   |
| Head circumference at discharge, (cm)*                                          | 31.5 (1.61)               | 31.4 (1.39)              | 0.34(-0.29 to 0.98)        | 0.287   |
| Head circumference Z-score at discharge**                                       | -1.33<br>(-1.69 to -0.59) | -0.91<br>(-1.61 to -0.4) | -0.42<br>(-0.87 to 0.04)   | 0.383   |
| Gestational age at discharge**                                                  | 36.5<br>(35-38)           | 36<br>(35-37)            | 0.50 (-0.53 to 1.52)       | 0.060   |
| Length of stay (days)**                                                         | 36<br>(22-55)             | 28.5<br>(20-52)          | 7.5<br>(-3.87 to 18.87)    | 0.157   |

\*\* Median (IQR); \* Mean (SD); MD, mean or median difference, CI, Confidence Interval. P-values and MD for comparisons between the two groups were determined by the Student's t-test or Mann-Whitney U test for continuous variables and by Chi squared or Fisher's exact tests for categorical variables, as appropriate.



Table 4: Factors associated with the change in weight-for-age Z-score between birth and discharge

| Factors                                                                                                                              | Malaysia<br>n=50                           |                                             | UK<br>n=50                                 |                                          |
|--------------------------------------------------------------------------------------------------------------------------------------|--------------------------------------------|---------------------------------------------|--------------------------------------------|------------------------------------------|
|                                                                                                                                      | Unadjusted<br>$\beta$ (95% CI),<br>p-value | Adjusted<br>$\beta$ (95%<br>CI),<br>p-value | Unadjusted<br>$\beta$ (95% CI),<br>p-value | Adjusted<br>$\beta$ (95% CI),<br>p-value |
| <b>Maternal and infant characteristics</b>                                                                                           |                                            |                                             |                                            |                                          |
| Mother's age (years)                                                                                                                 | -0.02 (-0.05 to 0.01), p=0.159             |                                             | -0.04 (-0.07 to -0.02), p=0.003            | -0.03 (-0.05 to -0.01), p=0.011          |
| Birthweight-for-age Z-score                                                                                                          | 0.06 (-0.11 to 0.24), p= 0.482             |                                             | -0.25 (-0.48 to -0.02), p=0.038            | -0.29 (-0.45 to -0.13), p=0.001          |
| Length of stay                                                                                                                       | -0.01(-0.02 to -0.01), p<0.001             | -0.01 (-0.02 to -0.01), p<0.001             | -0.01(-0.02 to 0.001), p=0.065             | -0.01 (-0.02 to -0.005), p=0.001         |
| Day of life reaching full enteral feed                                                                                               | -0.05 (-0.08 to -0.02), p=0.001            |                                             | -0.08 (-0.14 to -0.02), p=0.013            | -0.05 (-0.09 to -0.004), p=0.030         |
| <b>Nutritional intakes in weeks 1-4</b>                                                                                              |                                            |                                             |                                            |                                          |
| Protein intake, g/kg/d                                                                                                               | -0.21(-0.51 to 0.10) p=0.178               |                                             | 0.47 (0.20 to 0.74), p=0.001               | 0.36 (0.12 to 0.59), p=0.004             |
| Protein energy ratio, g/100kcal/d                                                                                                    | -0.41(-0.98 to 0.16), p=0.158              |                                             | 0.48 (0.15 to 0.80), p=0.005               | 0.34 (0.04 to 0.65), p=0.027             |
| CI, Confidence Interval. Adjusted $\beta$ values are displayed only for variables that are included in the final model of regression |                                            |                                             |                                            |                                          |

# BMJ Paediatrics Open

## Nutritional practices and growth of preterm infants in two neonatal units in the UK and Malaysia: a prospective exploratory study

|                               |                                                                                                                                                                                                                                                                                                                                                                                                                                                                                                                                                                                                                                                                             |
|-------------------------------|-----------------------------------------------------------------------------------------------------------------------------------------------------------------------------------------------------------------------------------------------------------------------------------------------------------------------------------------------------------------------------------------------------------------------------------------------------------------------------------------------------------------------------------------------------------------------------------------------------------------------------------------------------------------------------|
| Journal:                      | <i>BMJ Paediatrics Open</i>                                                                                                                                                                                                                                                                                                                                                                                                                                                                                                                                                                                                                                                 |
| Manuscript ID                 | bmjpo-2021-001153.R2                                                                                                                                                                                                                                                                                                                                                                                                                                                                                                                                                                                                                                                        |
| Article Type:                 | Original research                                                                                                                                                                                                                                                                                                                                                                                                                                                                                                                                                                                                                                                           |
| Date Submitted by the Author: | 11-Aug-2021                                                                                                                                                                                                                                                                                                                                                                                                                                                                                                                                                                                                                                                                 |
| Complete List of Authors:     | Abdul Hamid, Haslina; University of Nottingham, Population and Lifespan Sciences, School of Medicine; Universiti Kebangsaan Malaysia, Dietetic Programme, Faculty of Health Sciences<br>Szatkowski, Lisa; University of Nottingham, Population and Lifespan Sciences, School of Medicine<br>Budge, Helen; University of Nottingham, Population and Lifespan Sciences, School of Medicine<br>Cheah, Fook-Choe; Universiti Kebangsaan Malaysia, Department of Paediatrics, Faculty of Medicine<br>Ojha, Shalini; University of Nottingham, Population and Lifespan Sciences, School of Medicine; University Hospitals of Derby and Burton NHS Foundation Trust, Neonatal Unit |
| Keywords:                     | Neonatology, Growth                                                                                                                                                                                                                                                                                                                                                                                                                                                                                                                                                                                                                                                         |
|                               |                                                                                                                                                                                                                                                                                                                                                                                                                                                                                                                                                                                                                                                                             |

SCHOLARONE™  
Manuscripts



I, the Submitting Author has the right to grant and does grant on behalf of all authors of the Work (as defined in the below author licence), an exclusive licence and/or a non-exclusive licence for contributions from authors who are: i) UK Crown employees; ii) where BMJ has agreed a CC-BY licence shall apply, and/or iii) in accordance with the terms applicable for US Federal Government officers or employees acting as part of their official duties; on a worldwide, perpetual, irrevocable, royalty-free basis to BMJ Publishing Group Ltd ("BMJ") its licensees and where the relevant Journal is co-owned by BMJ to the co-owners of the Journal, to publish the Work in this journal and any other BMJ products and to exploit all rights, as set out in our [licence](#).

The Submitting Author accepts and understands that any supply made under these terms is made by BMJ to the Submitting Author unless you are acting as an employee on behalf of your employer or a postgraduate student of an affiliated institution which is paying any applicable article publishing charge ("APC") for Open Access articles. Where the Submitting Author wishes to make the Work available on an Open Access basis (and intends to pay the relevant APC), the terms of reuse of such Open Access shall be governed by a Creative Commons licence – details of these licences and which [Creative Commons](#) licence will apply to this Work are set out in our licence referred to above.

Other than as permitted in any relevant BMJ Author's Self Archiving Policies, I confirm this Work has not been accepted for publication elsewhere, is not being considered for publication elsewhere and does not duplicate material already published. I confirm all authors consent to publication of this Work and authorise the granting of this licence.

1  
2  
3 **Nutritional practices and growth of preterm infants in two neonatal units in**  
4 **the UK and Malaysia: a prospective exploratory study**  
5  
6  
7

8 Haslina Binti Abdul Hamid<sup>1,2</sup>, Lisa Szatkowski<sup>1</sup>, Helen Budge<sup>1</sup>, Fook Choe Cheah<sup>3</sup>,

9  
10 Shalini Ojha<sup>1,4</sup>  
11

12  
13  
14 **Corresponding author:** Shalini Ojha  
15

16 Room 4117, Medical School Building, Royal Derby Hospital, Derby, DE23 3DT.  
17

18 Email: [shalini.ojha@nottingham.ac.uk](mailto:shalini.ojha@nottingham.ac.uk)  
19

20 Telephone: +44 1332 724691  
21  
22

23  
24 Haslina Binti Abdul Hamid  
25

26 <sup>1</sup>Population and Lifespan Sciences, School of Medicine, University of Nottingham,  
27

28 UK  
29

30 <sup>2</sup>Dietetic Programme, Faculty of Health Sciences, Universiti Kebangsaan Malaysia,  
31

32 50300 Kuala Lumpur  
33  
34

35  
36 Lisa Szatkowski  
37

38 <sup>1</sup>Population and Lifespan Sciences, School of Medicine, University of Nottingham,  
39

40 UK  
41  
42

43  
44 Helen Budge  
45

46 <sup>1</sup>Population and Lifespan Sciences, School of Medicine, University of Nottingham,  
47

48 UK  
49  
50

51  
52 Fook Choe Cheah  
53

54 <sup>3</sup>Department of Paediatrics, Faculty of Medicine, Universiti Kebangsaan Malaysia,  
55

56 56000 Kuala Lumpur  
57  
58  
59  
60

1  
2  
3  
4  
5 Shalini Ojha  
6

7 <sup>1</sup>Population and Lifespan Sciences, School of Medicine, University of Nottingham,  
8

9 UK  
10

11 <sup>4</sup>Neonatal Unit, University Hospitals of Derby and Burton, Derby, DE23 3DT  
12  
13  
14

15  
16 Word Count: 2485  
17  
18

19 Key words: infant, preterm, nutrition, growth, small for gestational age,  
20

21 breastfeeding, breast milk fortifier  
22  
23  
24  
25  
26  
27  
28  
29  
30  
31  
32  
33  
34  
35  
36  
37  
38  
39  
40  
41  
42  
43  
44  
45  
46  
47  
48  
49  
50  
51  
52  
53  
54  
55  
56  
57  
58  
59  
60

## ABSTRACT

**Objective** To explore differences in nutritional practices and growth outcomes among preterm infants in neonatal units in Malaysia and the UK

**Design** Prospective exploratory study of infants born at <34 weeks gestational age (GA).

**Setting** Two neonatal units, one in Malaysia and one in the UK (May 2019 to March 2020).

**Methods** Data collected from birth until discharge and compared between units.

**Results** From 100 infants included, median GA (IQR) was 31(30-33) and mean±SD birthweight was 1549±444g. There were more small-for-gestational age (SGA) infants in Malaysian unit: 12/50 (24%) vs UK: 3/50 (6%),  $p=0.012$  and more morbidities. More Malaysian infants received breast milk (Malaysia: 49 (98%) vs UK: 38 (76%),  $p=0.001$ ), fortified breast milk (Malaysia: 43 (86%) vs UK: 13 (26%),  $p<0.001$ ), and exclusive breast milk at discharge (Malaysia: 26 (52%) vs UK: 16 (32%),  $p=0.043$ ). There was higher parenteral nutrition use among Malaysian infants (40 (80%)) vs UK (19 (38%)) ( $p<0.001$ ) with higher protein intake (mean±SD Malaysia:  $3.0\pm 0.5$  vs UK:  $2.7\pm 0.6$ g/kg/d,  $p=0.004$ ) in weeks 1-4 and smaller cumulative protein deficits (mean±SD Malaysia:  $11.4\pm 6.1$  vs UK:  $15.4\pm 8.0$ g/kg,  $p=0.006$ ). There were no significant differences in short-term growth between units and more than half of the infants in both units had  $>-1.28$  changes in weight-for-age Z-score at discharge ( $p=0.841$ ).

**Conclusions** An exploratory comparison of practices showed differences in patient characteristics and nutritional practices which impacted growth. Future studies with larger sample sizes and detailed analysis of maternal characteristics and infants' outcomes are needed for improving care of preterm infants in all settings.

**Word count: 250**

**What is already known on this topic**

1. There is high rate of postnatal growth failure among preterm infants in neonatal units worldwide.
2. Postnatal growth failure in neonatal units in high income countries is well studied, but in upper middle-income countries, nutritional practices and growth outcomes are less explored despite rapid advancement in neonatal care.
3. Varied nutritional practices such as parenteral nutrition and protein intakes are independent predictors of the growth outcomes of preterm infants at discharge.

**What this study adds**

1. In this exploratory study, we found that infants in the Malaysian unit were more likely to be small for gestational age and have co-morbidities.
2. Mother's own milk (MOM) is more frequently used in the Malaysian unit and more infants received supplementation with breast milk fortifiers.
3. More infants in the Malaysian unit received parenteral nutrition, although this may be a response to the greater nutritional needs of SGA infants.

## INTRODUCTION

Growth is one of the most important outcomes in determining the well-being of a preterm infant (1), and provision of optimal nutrition is a modifiable independent factor that could facilitate growth (2). Factors such as clinical traditions and resource limitations in hospitals may influence the adoption of effective feeding practices (3). Internationally, nutritional recommendations (4,5) have been created and growth studies were evaluated among preterm populations in the UK (6), USA (7) and other high-income settings (8). However, there is a paucity of studies in this area among low, middle and upper-middle-income countries, despite the growing availability of neonatal intensive care in these settings. Malaysia, as an upper-middle income country, has one of the lowest Neonatal Mortality Rates (NMR) in ASEAN countries at 5 per 1,000 live births in 2019, in line with its advancement in neonatal care services, which is comparable to the UK's NMR of 3 per 1,000 live births (9). A study on nutritional practices and growth outcomes from a neonatal unit in Malaysia was last performed in 2011, showing that more than 80% of very low birth weight infants had a >1 SD decline in weight-for-age Z-score (WAZ) by 36 weeks corrected gestational age (GA) (10). This study was over a decade ago and not much research has explored the impact of improvements in neonatal care or considered whether it is feasible to compare nutritional practices in upper-middle income settings with a higher income country setting. This exploratory study aimed to describe nutritional practices and postnatal growth outcomes in a neonatal unit in Malaysia, as an upper-middle-income country, as compared to one in the UK.

## METHODS

The study was carried out in the neonatal units of the Royal Derby Hospital, UK and the Hospital Canselor Tuanku Muhriz, Malaysia, from May 2019 to March 2020. The UK unit is a Local Neonatal Unit (level II) (11) routinely caring for infants born at >25



1  
2  
3 weeks GA. More immature infants and those requiring surgical care are transferred  
4  
5 to appropriate centres. The Malaysian unit is a tertiary neonatal unit (level IIIb) (12)  
6  
7 which also provides surgical support on-site (except for cardiac surgery). In RDH,  
8  
9 the neonatal unit has 24 neonatal cots and caters for 6000-7000 birth per year,  
10  
11 while in HCTM, its neonatal unit has 26 cots and also caters for approximately 6000  
12  
13 birth per year. With an exception for not providing inhouse surgical support in the  
14  
15 UK unit, both units provide similar types of care which comprises of care for the  
16  
17 stable to intensive care infants. Both hospitals follow similar discharge criteria  
18  
19 including weight of at least 1800g, not needing any additional medical support, and  
20  
21 fully milk fed.  
22  
23  
24  
25

26  
27 Infants <34 weeks' GA who were admitted to either unit were recruited  
28  
29 consecutively and followed to discharge until the sample size of 50 was reached at  
30  
31 each site. Infants were included if admitted within 24 hours of birth, not transferred  
32  
33 out for any part of their care and had length of stay of  $\geq 14$  days. Infants with major  
34  
35 congenital anomalies, genetic abnormalities or missing records for  $\geq 3$  days were  
36  
37 excluded. As this was an exploratory study, the sample size was determined based  
38  
39 on the usual monthly admissions and length of stay at the respective units.  
40  
41 Therefore, collection of data from 50 infants from each unit (total of 100) was  
42  
43 deemed to be feasible within the time and resources available for the study.  
44  
45  
46  
47

48  
49 Anonymised data were extracted from paper or electronic medical records  
50  
51 (accessed from BadgerNet (Client version 2.9.1.0) in the UK, and the Caring  
52  
53 Hospital Enterprise System (C-HETS) in Malaysia).  
54  
55

### 56 **Baseline and feeding data**

57  
58 Infant and maternal characteristics including sex, GA at birth, maternal age, and  
59  
60 parity as well as infants' clinical characteristics were collected prospectively. In the

1  
2  
3 Malaysian unit, GA was determined by using early first trimester ultrasound or by  
4  
5 estimation based on last menstrual period for those who presented in later  
6  
7 pregnancy. In the UK unit, GA was determined by early first trimester ultrasound.  
8  
9 These records were retrieved from both paper and electronic medical records. For  
10  
11 feeding data, daily nutritional intakes including parenteral nutrition (PN) and enteral  
12  
13 nutrition (EN) were recorded. Volume of breast milk intakes were recorded only from  
14  
15 bottle-feeding (expressed breast milk) as units do not routinely record before and  
16  
17 after feeding weight for direct breastfeeding. The nutritional content of EN and PN  
18  
19 (protein, lipid, and carbohydrate content) were calculated based on the  
20  
21 manufacturers' literature while the composition of breast milk was based on current  
22  
23 evidence (13). Nutrient deficits were calculated as the difference between actual  
24  
25 intake and the minimum intake recommended by ESPGHAN (2010) guidelines (4).  
26  
27  
28  
29

30 Similar feeding protocols are used in both units. Generally, minimal enteral feeding  
31  
32 (5-15ml/kg/d) is started within the first 24 hours. The units have guidelines on  
33  
34 advancing feeds, promoting the use of mother's milk and the use of breast milk  
35  
36 fortification and micronutrient supplementation.  
37  
38  
39

### 40 **Growth measures**

41  
42 The Fenton growth chart (14) was used as a reference for all growth assessments  
43  
44 in both units in determining Z-scores. We used the same charts for both groups to  
45  
46 enable a comparison of postnatal growth trajectories. The Fenton chart was chosen  
47  
48 for this study for its advantage of using more recent and larger sample of preterm  
49  
50 infants' data from many countries which link to the WHO growth data. It is routinely  
51  
52 used in the Malaysian unit. In this study, only weight and head circumference (HC)  
53  
54 measurements were assessed, as length is not routinely measured in the UK unit.  
55  
56  
57  
58  
59  
60

1  
2  
3 The marker for growth used in this study is the change in weight-for-age Z-scores  
4 (WAZ) from birth to discharge which was determined by subtracting the WAZ at  
5 birth from the WAZ at discharge. This was used due to the better sensitivity of  
6 weight than HC measurements in determining short term growth and Z-score as the  
7 best system for presentation and evaluation of anthropometric data (15) especially  
8 in indicating change over time. Postnatal growth failure was defined as a decrease  
9 in WAZ between birth and discharge of  $\geq 1.28$  as used in previous studies (16,17).  
10 SGA was defined as birth weight  $< 10^{\text{th}}$  centile for birth weight (18).  
11  
12  
13  
14  
15  
16  
17  
18  
19  
20  
21  
22  
23

### 24 **Statistical analysis**

25  
26 All statistical analyses were performed using STATA 16.0 (Stata Corp. College  
27 Station, TX). Descriptive statistics were used to summarise the demographic and  
28 clinical characteristics of infants and their mothers. Infants' EN, PN and combined  
29 intakes in weeks 1-4 and weeks 5-8 and the cumulative deficits accrued in this  
30 period were analysed. Growth outcomes and other variables collected at discharge  
31 were also compared. The characteristics of infants and mothers, feeding practices  
32 as well as growth outcomes in the UK and Malaysia cohorts were compared using  
33 the Student's t-test or Mann-Whitney U test for continuous variables and by Chi  
34 squared or Fisher's exact tests for categorical variables, as appropriate. Mean or  
35 median difference and 95% confidence intervals were calculated for nutritional  
36 intakes and growth outcomes value comparison between sites.  
37  
38  
39  
40  
41  
42  
43  
44  
45  
46  
47  
48  
49  
50

### 51 **Regulatory approvals**

52  
53 Ethical approval was obtained from the Health Research Authority (HRA) and  
54 Health and Care Research Wales (HCRW) Approval (United Kingdom) [IRAS  
55 project ID: 258817, Protocol number: 19012] and Research Ethics Committee,  
56 Universiti Kebangsaan Malaysia (UKM) (Malaysia) [JEP-2019-325]. No parental  
57  
58  
59  
60

1  
2  
3 consent was sought as this was a prospective exploratory study using routinely  
4 recorded clinical data and this approach received no objection from the Ethics  
5 Committee in both study sites.  
6  
7  
8  
9

### 10 **Patient and Public Involvement**

11 Patients or the public were not involved in the design, conduct, reporting or  
12 distribution plans of our study.  
13  
14  
15  
16  
17  
18

### 19 **RESULTS**

20  
21 In this study, infants in Malaysia and the UK units were of similar GA, but Malaysian  
22 infants were lighter and had a lower WAZ and length-for-age Z-scores at birth  
23 although the HC Z-scores were not different (Table 1). There were more SGA  
24 infants in Malaysia (12/50; 24%) compared to the UK unit (3/50; 6%) ( $p=0.039$ ). In  
25 Malaysia unit, there were fewer multiple births, more morbidities, mothers were  
26 older and had had more previous births (Table 1).  
27  
28  
29  
30  
31  
32  
33  
34  
35

#### 36 **Enteral feeding**

37 Milk feeding was started on median day of life (DOL) of 2 ( $p=0.833$ ) in both units.  
38 Full milk feeds (defined as 150 ml/kg/d EN with no PN) was reached on median  
39 (IQR) DOL 9 (7-12) in Malaysia and DOL 8 (7-10) in the UK,  $p=0.400$  (Table 2).  
40  
41  
42  
43  
44  
45

46 More infants in Malaysia received any mother's own milk (MOM) during admission  
47 (Malaysia: 98% vs UK: 76%,  $p=0.001$ ) and more infants in the UK received formula  
48 milk (Malaysia: 80% vs. UK: 94%,  $p=0.037$ ). Among infants who were fed their  
49 MOM, 86% infants had BMF added on median (IQR) DOL 11 (8-16) in Malaysia  
50 when they were receiving a median (IQR) milk volume of 154 (149-164) ml/kg/d  
51 while 26% infants had BMF added on median (IQR) DOL 15 (10-20) at median  
52 (IQR) milk volume of 157 (132-167) ml/kg/d,  $p=0.655$  in the UK. At discharge, 52%  
53  
54  
55  
56  
57  
58  
59  
60

1  
2  
3 infants were exclusively breast milk-fed in Malaysia compared to 32% in the UK  
4  
5 (p=0.043) (Table 2).  
6  
7  
8

### 9 10 **Parenteral feeding**

11 40 (80%) infants received PN in Malaysia compared to 19 (38%) in the UK. PN was  
12 started on a median DOL 2 in both units (p=0.414) but was given for an average of  
13 three days longer in Malaysia than in the UK (median (IQR) days of PN in Malaysia:  
14 9 (6-14) vs. UK: 6 (5-8), p=0.031 (Table 2).  
15  
16  
17  
18  
19  
20  
21

### 22 **Nutritional intakes**

23  
24 There was no significant difference in energy intakes in weeks 1-4 between the two  
25 units (p=0.238). However, Malaysian infants received more protein (Malaysia:  
26 3.0±0.5 g/kg/d vs UK: 2.7±0.6 g/kg/d, p=0.004) and had smaller cumulative energy  
27 and protein deficits over this period, than the UK infants (Malaysia (energy):  
28 191.6±129.8 vs UK: 254.5±152.0 kcal/kg, p=0.028 and Malaysia (protein):11.4±6.1  
29 vs UK: 15.4±8.0g/kg, p=0.006). Protein energy ratio (PER) was also higher in the  
30 Malaysia unit (Malaysia: 3.03±0.31 g/100kcal/d vs. UK: 2.61±0.48 g/100kcal/d,  
31 p<0.001) (Table 2).  
32  
33  
34  
35  
36  
37  
38  
39  
40  
41  
42

43 For those infants who remained in the hospital in weeks 5-8 of life (Malaysia: n=28,  
44 UK: n=23), better energy intakes were shown in both units although energy deficits  
45 in the UK cohort persisted. No significant difference in protein intakes was found  
46 between units but cumulative protein deficits in Malaysian infants improved while  
47 the magnitude of the deficit worsened in UK infants (Malaysia: 8.7±11.8 g/kg vs UK:  
48 24.5 ±25.6 g/kg, p=0.005). This was despite a significantly lower total fluid intake at  
49 week 5-8 in the Malaysia unit (median, 141.4 ml/kg/d versus UK unit, 153.9 ml/kg/d)  
50  
51  
52  
53  
54  
55  
56  
57  
58  
59  
60 (Table 2).

### Postnatal growth

There were no significant differences in growth outcomes at discharge between infants from the two units (Table 3). WAZ declined by  $\geq 1.28$  in 52% and 54% of infants in Malaysia and the UK, respectively. The mean $\pm$ SD change in WAZ between birth and discharge was similar between the two cohorts (Malaysia:  $-1.31\pm 0.57$ ; UK:  $-1.33 \pm 0.58$ ;  $p=0.975$ ) (Table 3). For weekly WAZ (Figure 1), there was a decreasing trend in mean WAZ from postnatal week 1 to week 8 in both the UK and Malaysian unit. Infants in the UK unit had consistently higher mean weekly WAZ than infants in Malaysian unit.

### DISCUSSION

In this study, we observed more Malaysian infants received breast milk as compared to UK infants. This is consistent with each countries' national reports (19,20) that record a higher rate of breastfeeding among Malaysian infants. The higher rate of breast milk feeding among Malaysian infants is possibly related to older maternal age and higher parity among mothers, as shown in many studies (21,22). Experienced mothers may have an easier start to breastfeeding and their previous experiences could help with continuation of breastfeeding in the unit. Cultural differences in attitudes to breastfeeding between the UK and Malaysia, where breastfeeding is the norm and the prevalence is increasing (23) may also underlie some of the differences between breastfeeding rates in the two units. The Malaysian unit has an established accreditation as Baby Friendly Hospital (BFH) (24) which is favourably related to the high rate of initiation and continuation of breastfeeding (25,26). The UK unit has achieved stage 1 of BFI accreditation and is building towards a stage 2 (27).

Supplementation of breast milk with BMF or protein supplements was more frequent in the Malaysian unit while BMF was used more selectively in the UK unit. The

1  
2  
3 standard protocol recommends the addition of BMF at 75-100ml/kg/d milk feeds in  
4 Malaysian unit while in the UK unit, protocol suggests the addition of BMF when  
5 feeding reaches 150-180 ml/kg/ but only at clinician's discretion when there are  
6 significant concerns about growth. The majority of infants who were fed breast milk  
7 in the Malaysian unit received some fortification, while the majority of infants who  
8 received breast milk in the UK unit received some supplemental formula feeding  
9 instead. Interestingly, in the Malaysian unit, infants on mixed feeds i.e. who had  
10 breast and formula milk, continued fortification if predominantly breast milk fed while  
11 most mixed fed infants in the UK unit did not receive BMF.  
12  
13  
14  
15  
16  
17  
18  
19  
20  
21  
22

23 More Malaysian infants received PN which could be related to more SGA infants  
24 and higher rates of co-morbidities in this unit. Although they were given some  
25 enteral feeds, they were also started on PN possibly due to anticipation of feed  
26 intolerance and slower advancement of milk feeds. PN was used in this scenario  
27 possibly, with a view to boost nutrition while milk feeds were established.  
28  
29  
30  
31  
32

33 Additionally, PN support was provided for a longer duration. Infants in the UK unit  
34 were larger and less unwell and hence more likely to establish enteral feeding  
35 quicker and hence PN use was restricted. However, this study showed no difference  
36 between units with reference to the postnatal age when full feeds were established.  
37  
38  
39  
40  
41  
42  
43  
44  
45  
46  
47  
48  
49  
50  
51  
52  
53  
54  
55  
56  
57  
58  
59  
60

59  
60  
61  
62  
63  
64  
65  
66  
67  
68  
69  
70  
71  
72  
73  
74  
75  
76  
77  
78  
79  
80  
81  
82  
83  
84  
85  
86  
87  
88  
89  
90  
91  
92  
93  
94  
95  
96  
97  
98  
99  
100  
101  
102  
103  
104  
105  
106  
107  
108  
109  
110  
111  
112  
113  
114  
115  
116  
117  
118  
119  
120  
121  
122  
123  
124  
125  
126  
127  
128  
129  
130  
131  
132  
133  
134  
135  
136  
137  
138  
139  
140  
141  
142  
143  
144  
145  
146  
147  
148  
149  
150  
151  
152  
153  
154  
155  
156  
157  
158  
159  
160  
161  
162  
163  
164  
165  
166  
167  
168  
169  
170  
171  
172  
173  
174  
175  
176  
177  
178  
179  
180  
181  
182  
183  
184  
185  
186  
187  
188  
189  
190  
191  
192  
193  
194  
195  
196  
197  
198  
199  
200  
201  
202  
203  
204  
205  
206  
207  
208  
209  
210  
211  
212  
213  
214  
215  
216  
217  
218  
219  
220  
221  
222  
223  
224  
225  
226  
227  
228  
229  
230  
231  
232  
233  
234  
235  
236  
237  
238  
239  
240  
241  
242  
243  
244  
245  
246  
247  
248  
249  
250  
251  
252  
253  
254  
255  
256  
257  
258  
259  
260  
261  
262  
263  
264  
265  
266  
267  
268  
269  
270  
271  
272  
273  
274  
275  
276  
277  
278  
279  
280  
281  
282  
283  
284  
285  
286  
287  
288  
289  
290  
291  
292  
293  
294  
295  
296  
297  
298  
299  
300  
301  
302  
303  
304  
305  
306  
307  
308  
309  
310  
311  
312  
313  
314  
315  
316  
317  
318  
319  
320  
321  
322  
323  
324  
325  
326  
327  
328  
329  
330  
331  
332  
333  
334  
335  
336  
337  
338  
339  
340  
341  
342  
343  
344  
345  
346  
347  
348  
349  
350  
351  
352  
353  
354  
355  
356  
357  
358  
359  
360  
361  
362  
363  
364  
365  
366  
367  
368  
369  
370  
371  
372  
373  
374  
375  
376  
377  
378  
379  
380  
381  
382  
383  
384  
385  
386  
387  
388  
389  
390  
391  
392  
393  
394  
395  
396  
397  
398  
399  
400  
401  
402  
403  
404  
405  
406  
407  
408  
409  
410  
411  
412  
413  
414  
415  
416  
417  
418  
419  
420  
421  
422  
423  
424  
425  
426  
427  
428  
429  
430  
431  
432  
433  
434  
435  
436  
437  
438  
439  
440  
441  
442  
443  
444  
445  
446  
447  
448  
449  
450  
451  
452  
453  
454  
455  
456  
457  
458  
459  
460  
461  
462  
463  
464  
465  
466  
467  
468  
469  
470  
471  
472  
473  
474  
475  
476  
477  
478  
479  
480  
481  
482  
483  
484  
485  
486  
487  
488  
489  
490  
491  
492  
493  
494  
495  
496  
497  
498  
499  
500  
501  
502  
503  
504  
505  
506  
507  
508  
509  
510  
511  
512  
513  
514  
515  
516  
517  
518  
519  
520  
521  
522  
523  
524  
525  
526  
527  
528  
529  
530  
531  
532  
533  
534  
535  
536  
537  
538  
539  
540  
541  
542  
543  
544  
545  
546  
547  
548  
549  
550  
551  
552  
553  
554  
555  
556  
557  
558  
559  
560  
561  
562  
563  
564  
565  
566  
567  
568  
569  
570  
571  
572  
573  
574  
575  
576  
577  
578  
579  
580  
581  
582  
583  
584  
585  
586  
587  
588  
589  
590  
591  
592  
593  
594  
595  
596  
597  
598  
599  
600  
601  
602  
603  
604  
605  
606  
607  
608  
609  
610  
611  
612  
613  
614  
615  
616  
617  
618  
619  
620  
621  
622  
623  
624  
625  
626  
627  
628  
629  
630  
631  
632  
633  
634  
635  
636  
637  
638  
639  
640  
641  
642  
643  
644  
645  
646  
647  
648  
649  
650  
651  
652  
653  
654  
655  
656  
657  
658  
659  
660  
661  
662  
663  
664  
665  
666  
667  
668  
669  
670  
671  
672  
673  
674  
675  
676  
677  
678  
679  
680  
681  
682  
683  
684  
685  
686  
687  
688  
689  
690  
691  
692  
693  
694  
695  
696  
697  
698  
699  
700  
701  
702  
703  
704  
705  
706  
707  
708  
709  
710  
711  
712  
713  
714  
715  
716  
717  
718  
719  
720  
721  
722  
723  
724  
725  
726  
727  
728  
729  
730  
731  
732  
733  
734  
735  
736  
737  
738  
739  
740  
741  
742  
743  
744  
745  
746  
747  
748  
749  
750  
751  
752  
753  
754  
755  
756  
757  
758  
759  
760  
761  
762  
763  
764  
765  
766  
767  
768  
769  
770  
771  
772  
773  
774  
775  
776  
777  
778  
779  
780  
781  
782  
783  
784  
785  
786  
787  
788  
789  
790  
791  
792  
793  
794  
795  
796  
797  
798  
799  
800  
801  
802  
803  
804  
805  
806  
807  
808  
809  
810  
811  
812  
813  
814  
815  
816  
817  
818  
819  
820  
821  
822  
823  
824  
825  
826  
827  
828  
829  
830  
831  
832  
833  
834  
835  
836  
837  
838  
839  
840  
841  
842  
843  
844  
845  
846  
847  
848  
849  
850  
851  
852  
853  
854  
855  
856  
857  
858  
859  
860  
861  
862  
863  
864  
865  
866  
867  
868  
869  
870  
871  
872  
873  
874  
875  
876  
877  
878  
879  
880  
881  
882  
883  
884  
885  
886  
887  
888  
889  
890  
891  
892  
893  
894  
895  
896  
897  
898  
899  
900  
901  
902  
903  
904  
905  
906  
907  
908  
909  
910  
911  
912  
913  
914  
915  
916  
917  
918  
919  
920  
921  
922  
923  
924  
925  
926  
927  
928  
929  
930  
931  
932  
933  
934  
935  
936  
937  
938  
939  
940  
941  
942  
943  
944  
945  
946  
947  
948  
949  
950  
951  
952  
953  
954  
955  
956  
957  
958  
959  
960  
961  
962  
963  
964  
965  
966  
967  
968  
969  
970  
971  
972  
973  
974  
975  
976  
977  
978  
979  
980  
981  
982  
983  
984  
985  
986  
987  
988  
989  
990  
991  
992  
993  
994  
995  
996  
997  
998  
999  
1000

1  
2  
3 Additionally, any change to feeding strategies for the individual infant would also,  
4  
5 understandably, be a response to infants' clinical conditions which might not be  
6  
7 detected in this study.  
8  
9

10  
11 Despite notable differences in intake, there were no significant differences in the  
12  
13 short-term growth at discharge between the units. Throughout admission, the UK  
14  
15 infants were observed to have consistently higher weekly weight Z-score than  
16  
17 Malaysian infants, although both groups had a decline in growth trajectories. The  
18  
19 differences in infant characteristics, possibly birthweight and co-morbidities, may  
20  
21 explain this. Baseline anthropometric assessment showed that there was a  
22  
23 significantly higher proportion of SGA infants in the Malaysian unit. This is possibly  
24  
25 due to the centre acting as a referral hospital for high-risk obstetric cases involving  
26  
27 mothers with pre-eclampsia, diabetes and fetal growth restriction. In addition, the  
28  
29 Fenton growth chart that was used in this study may not represent the Asian  
30  
31 population as much as it was constructed based on mostly a Caucasian population  
32  
33 (14), which could also lead to higher SGA infants classified in the Malaysian unit.  
34  
35 Studies showed that there were significant deviations in the assessments of growth  
36  
37 depending on the growth charts used (30,31). Infants in the Malaysian unit were  
38  
39 also challenged with a higher incidence of co-morbidities such as chronic lung  
40  
41 disease and patent ductus arteriosus that likely necessitated the restriction of total  
42  
43 fluid intake which could affect growth. However, any interpretation for 'optimal  
44  
45 growth' outcome should explore factors other than weight only, including longer-  
46  
47 term growth, neurodevelopmental, and metabolic outcomes in later life. Studies  
48  
49 show that preterm infants fed mainly breast milk have better long-term outcome  
50  
51 despite slower weight gain in early life (32,33).  
52  
53  
54  
55  
56  
57

58 The strengths of this study are that it is the first attempt to explore comparison of  
59  
60 nutritional practices between two-centres in different settings. Prospective collection



1  
2  
3 of details of daily actual nutritional intake and weekly growth allowed a  
4  
5 comprehensive analysis of nutritional practices. However, as this is an exploratory  
6  
7 study, the sample size was small and not powered for differences in outcomes. A  
8  
9 larger sample size is needed for evaluating the reasons for the differences observed  
10  
11 in this study affecting growth failure. Estimation of nutritional intakes in breastfed  
12  
13 infants cannot be accurate as intakes were analysed by using the best available  
14  
15 estimates (13) and may not reflect the true nutritional composition of the milk  
16  
17 received. Maternal details including her nutritional status, clinical conditions, and  
18  
19 antenatal care should also be considered as these are vital determinants of fetal  
20  
21 nutrition and infants' outcomes including SGA status (34).  
22  
23  
24  
25

26 Despite these limitations, studies comparing nutritional intakes and growth  
27  
28 outcomes are feasible to do in these two countries. Malaysia is an upper middle-  
29  
30 income country with similar government-funded healthcare system and NMR as the  
31  
32 UK. The nutritional protocols used in these two units were based on the similar  
33  
34 international guideline but were applied differently perhaps due to differences in  
35  
36 patient characteristics and cultural differences making such comparisons an  
37  
38 interesting area of study. Studies with an adequately powered sample, collection of  
39  
40 more data on maternal characteristics and infants' longer term outcomes and the  
41  
42 use of a more representative growth chart would provide evidence to ensure that  
43  
44 preterm infants receive adequate nutrition, hopefully, in all care settings globally.  
45  
46  
47  
48  
49

## 50 **CONCLUSION**

51 In our exploratory analyses, there were variations in nutritional practices between  
52  
53 the two units included in this study. Current nutritional practices often do not meet  
54  
55 recommended intakes, especially for protein in preterm infants. We found that with  
56  
57 international collaboration, future comparison studies involving units in varied  
58  
59  
60

1  
2  
3 income settings are feasible and may provide evidence to support equity in care of  
4  
5 preterm infants.  
6  
7  
8  
9  
10  
11  
12  
13  
14  
15  
16  
17  
18  
19  
20  
21  
22  
23  
24  
25  
26  
27  
28  
29  
30  
31  
32  
33  
34  
35  
36  
37  
38  
39  
40  
41  
42  
43  
44  
45  
46  
47  
48  
49  
50  
51  
52  
53  
54  
55  
56  
57  
58  
59  
60

Confidential: For Review Only

**Acknowledgements** We would like to acknowledge the support of all the staff at Royal Derby Hospital and Hospital Canselor Tuanku Muhriz neonatal units for their assistance during the data collection process of this study. We also would like to acknowledge Janine Abramson and Coral Smith who assisted in the electronic data collection in the UK unit, Drs Cho Cho Latt and Tian-Lee Tan for the data collection in Malaysia unit.

**Contributors** HAH, SO, LS, HB and FCC conceptualised and designed the study and reviewed and revised the manuscript. HAH performed the data collection in the UK unit, completed the data analysis and drafted the initial manuscript. All authors approved the final manuscript as submitted and agree to be accountable for all aspects of the work.

**Funding** HAH is supported by a PhD scholarship from the Ministry of Higher Education Malaysia and Universiti Kebangsaan Malaysia (UKM).

**Competing interests** None declared.

**Patient consent** Not required.

**Provenance and peer review** Yes

## References

1. Young A, Andrews ET, Ashton JJ, Pearson F, Beattie RM, Johnson MJ. Generating longitudinal growth charts from preterm infants fed to current recommendations. *Arch Dis Child - Fetal Neonatal Ed.* 2020 Nov;105(6):646–51.
2. Stoltz Sjöström E, Öhlund I, Ahlsson F, Engström E, Fellman V, Hellström A, et al. Nutrient intakes independently affect growth in extremely preterm infants: Results from a population-based study. *Acta Paediatr Int J Paediatr.* 2013;102(11):1067–74.
3. de Waard M, Li Y, Zhu Y, Ayede AI, Berrington J, Bloomfield FH, et al. Time to Full Enteral Feeding for Very Low-Birth-Weight Infants Varies Markedly Among Hospitals Worldwide But May Not Be Associated With Incidence of Necrotizing Enterocolitis: The NEOMUNE-NeoNutriNet Cohort Study. *J Parenter Enter Nutr.* 2018;
4. Agostoni C, Buonocore G, Carnielli VP, De Curtis M, Darmaun D, Decsi T, et al. Enteral nutrient supply for preterm infants: Commentary from the european

- society of paediatric gastroenterology, hepatology and nutrition committee on nutrition. *J Pediatr Gastroenterol Nutr.* 2010;50(1):85–91.
5. Koletzko B, Poindexter B, Uauy R. Nutrition of the preterm infant: Scientific Basis and Practical Guidelines. Basel: Karger; 2014.
  6. Andrews ET, Ashton JJ, Pearson F, Mark Beattie R, Johnson MJ. Early postnatal growth failure in preterm infants is not inevitable. *Arch Dis Child Fetal Neonatal Ed.* 2018;10–2.
  7. Horbar JD, Ehrenkranz RA, Badger GJ, Edwards EM, Morrow KA, Soll RF, et al. Weight Growth Velocity and Postnatal Growth Failure in Infants 501 to 1500 Grams: 2000-2013. *Pediatrics.* 2015;136(1):e84–92.
  8. Cormack BE, Jiang Y, Harding JE, Crowther CA, Bloomfield FH. Relationships between Neonatal Nutrition and Growth to 36 Weeks' Corrected Age in ELBW Babies—Secondary Cohort Analysis from the Provide Trial. *Nutrients.* 2020 Mar 13;12(3):760.
  9. UNICEF. UNICEF Data Warehouse [Internet]. 2019. Available from: [https://data.unicef.org/resources/data\\_explorer/unicef\\_f/?ag=UNICEF&df=GLOBAL\\_DATAFLOW&ver=1.0&dq=GBR.CME\\_MRM0.&startPeriod=1970&endPeriod=2021](https://data.unicef.org/resources/data_explorer/unicef_f/?ag=UNICEF&df=GLOBAL_DATAFLOW&ver=1.0&dq=GBR.CME_MRM0.&startPeriod=1970&endPeriod=2021)
  10. Lee LY, Lee J, Niduvaje K, Seah SS-Y, Atmawidjaja RW, Cheah F-C. Nutritional therapies in the neonatal intensive care unit and post-natal growth outcomes of preterm very low birthweight Asian infants. *J Paediatr Child Health.* 2020;8.
  11. British Association of Perinatal Medicine (BAPM) (2010). Service standards for hospitals providing neonatal care, 3rd edition. [Internet]. 2010. Available from: [http://www.bapm.org/publications/documents/guidelines/BAPM\\_Standards\\_Final\\_Aug2010.pdf](http://www.bapm.org/publications/documents/guidelines/BAPM_Standards_Final_Aug2010.pdf)
  12. Ministry of Health Malaysia. The Operational Policy for Paediatric Services. the Medical Services Development Section; 2012.
  13. Gidrewicz DA, Fenton TR. A systematic review and meta-analysis of the nutrient content of preterm and term breast milk. *BMC Pediatr.* 2014 Aug 30;14:216.
  14. Fenton T, Kim J. A systematic review and meta-analysis to revise the Fenton growth chart for preterm infants. *BMC Pediatr.* 2013;13:59.
  15. Geneva: World Health Organization. Physical status: the use and interpretation of anthropometry. Report of a WHO Expert Committee. WHO Technical Report Series No. 854. 1995.
  16. Lin Z, Green RS, Chen S, Wu H, Liu T, Li J, et al. Quantification of EUGR as a measure of the quality of nutritional care of premature infants. *PLoS ONE.* 2015;10(7):1–10.
  17. Lee SM, Kim N, Namgung R, Park M, Park K, Jeon J. Prediction of Postnatal Growth Failure among Very Low Birth Weight Infants. *Sci Rep.* 2018;8(1):1–8.

18. Darmaun D, Lapillonne A, Simeoni U, Picaud J-C, Rozé J-C, Saliba E, et al. Parenteral nutrition for preterm infants: Issues and strategy. *Arch Pediatr Organe Off Soc Francaise Pediatr*. 2018 May;25(4):286–94.
19. Institute for Public Health. The National Health and Morbidity Survey (NHMS) 2016 [Internet]. Kuala Lumpur: Institute for Public Health, National Institutes of Health, Ministry of Health Malaysia; 2016. Available from: <http://iku.moh.gov.my/images/IKU/Document/REPORT/2016/NHMS2016ReportVolumell-MaternalChildHealthFindingsv2.pdf>
20. NHS Maternity Statistics, England 2017-18. Maternity and Breastfeeding [Internet]. Available from: <https://www.england.nhs.uk/statistics/statistical-work-areas/maternity-and-breastfeeding/>
21. Casey PH, Whiteside-Mansell L, Barrett K, Bradley RH, Gargus R. Impact of prenatal and/or postnatal growth problems in low birth weight preterm infants on school-age outcomes: an 8-year longitudinal evaluation. *Pediatrics*. 2006 Sep;118(3):1078–86.
22. Bonnet C, Blondel B, Piedvache A, Wilson E, Bonamy AE, Gortner L, et al. Low breastfeeding continuation to 6 months for very preterm infants: A European multiregional cohort study. *Matern Child Nutr* [Internet]. 2019 Jan [cited 2021 Feb 15];15(1). Available from: <https://onlinelibrary.wiley.com/doi/abs/10.1111/mcn.12657>
23. Fatimah S, Siti Saadiah HN, Tahir A, Hussain Imam MI, Ahmad Faudzi Y. Breastfeeding in Malaysia: Results of the Third National Health and Morbidity Survey (NHMS III) 2006. *Malays J Nutr*. 2010 Aug;16(2):195–206.
24. Ministry of Health Malaysia. National Breastfeeding Policy 2005 [Internet]. 2005. Available from: <http://nutrition.moh.gov.my/wp-content/uploads/penerbitan/poster/polisi%20penyusunan%20ibu.jpg>
25. Spaeth A, Zemp E, Merten S, Dratva J. Baby-Friendly Hospital designation has a sustained impact on continued breastfeeding. *Matern Child Nutr*. 2018 Jan;14(1):e12497.
26. Broadfoot M, Britten J, Tappin DM, MacKenzie JM. The Baby Friendly Hospital Initiative and breast feeding rates in Scotland. *Arch Dis Child Fetal Neonatal Ed*. 2005 Mar;90(2):F114-116.
27. UNICEF UK. Accreditation [Internet]. 2019. Available from: <https://www.unicef.org.uk/babyfriendly/accreditation/>
28. Senterre T, Rigo J. Reduction in postnatal cumulative nutritional deficit and improvement of growth in extremely preterm infants. *Acta Paediatr Int J Paediatr*. 2012;101(2):64–70.
29. Embleton NE, Pang N, Cooke RJ. Postnatal Malnutrition and Growth Retardation: An Inevitable Consequence of Current Recommendations in Preterm Infants? *Pediatrics*. 2001;107(2):270–3.
30. Kim Y, Shin SH, Cho H, Shin SH, Kim SH, Song IG, et al. Extrauterine growth restriction in extremely preterm infants based on the Intergrowth-21st Project Preterm Postnatal Follow-up Study growth charts and the Fenton growth charts.

1  
2  
3 Eur J Pediatr [Internet]. 2020 Sep 9 [cited 2021 Feb 15]; Available from:  
4 <http://link.springer.com/10.1007/s00431-020-03796-0>  
5

- 6  
7 31. Neubauer V, Fuchs T, Griesmaier E, Pupp-Peglow U, Kiechl-Kohlendorfer U.  
8 Comparing growth charts demonstrated significant deviations between the  
9 interpretation of postnatal growth patterns in very preterm infants. *Acta Paediatr*  
10 *Int J Paediatr*. 2016;105(3):268–73.  
11  
12 32. Rozé J-C, Darmaun D, Boquien C-Y, Flamant C, Picaud J-C, Savagner C, et al.  
13 The apparent breastfeeding paradox in very preterm infants: relationship  
14 between breast feeding, early weight gain and neurodevelopment based on  
15 results from two cohorts, EPIPAGE and LIFT. *BMJ Open*. 2012 Jan  
16 1;2(2):e000834.  
17  
18 33. Vohr BR, Poindexter BB, Dusick AM, McKinley LT, Higgins RD, Langer JC, et  
19 al. Persistent beneficial effects of breast milk ingested in the neonatal intensive  
20 care unit on outcomes of extremely low birth weight infants at 30 months of age.  
21 *Pediatrics*. 2007 Oct;120(4):e953-959.  
22  
23 34. McCowan L, Roberts C, Dekker G, Taylor R, Chan E, Kenny L, et al. Risk  
24 factors for small-for-gestational-age infants by customised birthweight centiles:  
25 data from an international prospective cohort study: Risk factors for SGA infants  
26 by customised centiles. *BJOG Int J Obstet Gynaecol*. 2010 Dec;117(13):1599–  
27 607.  
28  
29  
30  
31  
32  
33  
34  
35  
36  
37  
38  
39  
40  
41  
42  
43  
44  
45  
46  
47  
48  
49  
50  
51  
52  
53  
54  
55  
56  
57  
58  
59  
60

## Tables

Table 1: Infant and maternal characteristics of infants born at <34 weeks' gestational age and cared for in a neonatal unit in Malaysia and one in the UK

| Variables                                                  | Infants in the Malaysian unit<br>n=50 | Infants in the UK unit<br>n=50 | p-value |
|------------------------------------------------------------|---------------------------------------|--------------------------------|---------|
| Female, n (%)                                              | 21 (42)                               | 22 (44)                        | 0.84    |
| Gestational age at birth (weeks) median (IQR)              | 32 (29 to 32)                         | 31 (30 to 33)                  | 0.736   |
| Birthweight (grams) mean (SD)                              | 1448 (458)                            | 1649 (409)                     | 0.022   |
| Birthweight-for-age z-score mean (SD)                      | -0.53 (0.93)                          | -0.10 (0.70)                   | 0.009   |
| Small for gestational age, n (%)                           | 12 (24)                               | 3 (6)                          | 0.012   |
| HC at birth (cm), mean (SD)                                | 28 (2.68)                             | 28.9 (2.35)                    | 0.106   |
| HC-for-age z-score at birth, median (IQR)                  | -0.26<br>(-0.98 to 0.59)              | 0.06<br>(-0.57 to 0.59)        | 0.310   |
| Length at birth (cm) mean (SD)                             | 38.4 (3.65)                           | 41.9 (4.08)                    | <0.001  |
| Length at birth-for-age z-score mean (SD)                  | -0.92 (1.05)                          | 0.21(1.23)                     | <0.001  |
| Singleton birth, n (%)                                     | 45 (90)                               | 34 (68)                        | 0.007   |
| Mother's age (years) mean (SD)                             | 32 (5)                                | 29 (5)                         | 0.009   |
| Parity, median (IQR)                                       | 3 (1 to 4)                            | 0 (0 to 1)                     | <0.001  |
| Caesarean section, n (%)                                   | 37 (74)                               | 32 (64)                        | 0.280   |
| Apgar score at 5 minutes, median (IQR)                     | 9 (8 to 10)                           | 9 (9 to 9)                     | 0.844   |
| Antenatal steroid use, n (%)                               | 47 (94)                               | 42 (84)                        | 0.194   |
| Received positive pressure ventilation, n (%)              | 21 (42)                               | 27 (54)                        | 0.230   |
| Late onset sepsis (confirmed) <sup>#</sup> , n (%)         | 13 (26)                               | 4 (8)                          | <0.001  |
| Necrotising enterocolitis (suspected) <sup>#</sup> , n (%) | 6 (12)                                | 3 (6)                          | 0.243   |
| Intraventricular haemorrhage <sup>#</sup> , n (%)          | 36 (72)                               | 2 (4)                          | <0.001  |
| Retinopathy of prematurity <sup>#</sup> , n (%)            | 4 (8)                                 | 1 (2)                          | 0.181   |
| Periventricular leukomalacia <sup>#</sup> , n (%)          | 7 (14)                                | 0                              | 0.006   |
| Chronic lung disease <sup>#</sup> , n (%)                  | 10 (20)                               | 3 (6)                          | 0.036   |
| Patent ductus arteriosus <sup>#</sup> , n (%)              | 16 (32)                               | 6 (12)                         | 0.014   |

HC, head circumference; IQR, inter-quartile range; SD, standard deviation. P-values for comparisons between the two groups were determined by the Student's t-test or Mann-Whitney U test for continuous variables and by Chi squared or Fisher's exact tests for categorical variables, as appropriate.

<sup>#</sup>Diagnoses-were noted from clinical records: late onset sepsis (culture proven sepsis after 72 h of birth); necrotising enterocolitis (based on clinical or radiological features that needed at least 5 days of withheld feeding and antibiotics); retinopathy of prematurity (any stage diagnosed on screening examination); periventricular leukomalacia (any lesion reported on cranial ultrasound); chronic lung disease (infants requiring respiratory support including any supplemental oxygen at 36 weeks' corrected gestational age) and patent ductus arteriosus (diagnosed on echocardiography).

Table 2: Feeding practices and nutritional intakes in infants born at <34 weeks' gestational age and cared for in a neonatal unit in Malaysia and one in the UK

| Variables, n (%)                                                      | Malaysian group<br>n=50 | UK group<br>n=50    | p-value |
|-----------------------------------------------------------------------|-------------------------|---------------------|---------|
| Received any breast milk                                              | 49 (98)                 | 38 (76)             | 0.001   |
| Any breast milk at discharge                                          | 46 (92)                 | 25 (50)             | <0.001  |
| Exclusively breast milk feeding at discharge                          | 26 (52)                 | 16 (32)             | 0.043   |
| Received infant formula milk                                          | 40 (80)                 | 47 (94)             | 0.037   |
| Energy proportion (%) from breast milk during admission**             | 66.5<br>(40-83)         | 15.5<br>(2-82)      | 0.010   |
| Energy proportion (%) from formula milk during admission <sup>‡</sup> | 19.2<br>(2.2-52.3)      | 78.8<br>(12.7-93.9) | <0.001  |
| Day of life at first enteral milk feed**                              | 2 (1-3)                 | 2 (1-2)             | 0.833   |
| Day of life reaching 120 mL/kg/d feed**                               | 4<br>(4-5)              | 5<br>(4-5)          | 0.044   |
| Day of life reaching full enteral feed at 150 ml/kg/d**               | 9<br>(7-12)             | 8<br>(7-10)         | 0.400   |
| Rate of feeding advancement to full feed**                            | 13 (6-16)               | 16 (9-20)           | 0.390   |
| Received breast milk fortifier                                        | 43 (86)                 | 13 (26)             | <0.001  |
| Day of life at first breast milk fortifier received <sup>‡</sup>      | 11<br>(8-16)            | 15<br>(10-20)       | 0.039   |
| Received parenteral nutrition                                         | 40 (80)                 | 19 (38)             | <0.001  |
| Day of life at first parenteral nutrition**                           | 2 (1-2)                 | 2 (1-2)             | 0.414   |
| Duration of parenteral nutrition**                                    | 9 (6-14)                | 6 (5-8)             | 0.031   |
| Energy intake, kcal/kg/d*                                             |                         |                     |         |
| Week 1-4                                                              | 103 (13)                | 100 (11)            | 0.238   |
| Week 5-8                                                              | 110 (18)                | 115 (15)            | 0.363   |
| Cumulative energy deficits/excess <sup>‡</sup> , kcal/kg*             |                         |                     |         |
| Week 1-4                                                              | -191.6 (129.8)          | -254.5 (152.0)      | 0.028   |
| Week 5-8                                                              | 93.2(237.4)             | -93.8 (539.3)       | 0.105   |
| Protein intake, g/kg/d*                                               |                         |                     |         |
| Week 1-4                                                              | 3.0 (0.5)               | 2.7 (0.6)           | 0.004   |
| Week 5-8                                                              | 3.4 (0.7)               | 3.0 (0.8)           | 0.088   |
| Cumulative protein deficits/excess <sup>‡</sup> , g/kg*               |                         |                     |         |
| Week 1-4                                                              | -11.4 (6.1)             | -15.4 (8.0)         | 0.006   |
| Week 5-8                                                              | -8.7 (11.8)             | -24.5 (25.6)        | 0.005   |
| Protein energy ratio, g/100 kcal/d*                                   |                         |                     |         |
| Week 1-4                                                              | 2.82 (0.28)             | 2.61 (0.48)         | 0.008   |
| Week 5-8                                                              | 3.03 (0.31)             | 2.57 (0.38)         | <0.001  |
| Fat intake, g/kg/d*                                                   |                         |                     |         |
| Week 1-4                                                              | 4.8 (0.7)               | 4.8 (0.6)           | 0.627   |
| Week 5-8                                                              | 5.3 (1.0)               | 5.8 (0.7)           | 0.058   |
| Carbohydrate intake, g/kg/d*                                          |                         |                     |         |
| Week 1-4                                                              | 11.4 (1.9)              | 10.7(1.4)           | 0.020   |
| Week 5-8                                                              | 11.9 (2.0)              | 12.2(1.7)           | 0.607   |
| Fluid intake, ml/kg/d*                                                |                         |                     |         |
| Week 1-4                                                              | 137.1 (12.9)            | 138.8 (10.9)        | 0.491   |
| Week 5-8                                                              | 141.4 (22.4)            | 153.9 (13.9)        | 0.024   |

\*\*Median (IQR); \* Mean (SD); <sup>‡</sup>Negative value indicates deficits. P-values for comparisons between the two groups were determined by the Student's t-test or Mann-Whitney U test for continuous variables and by Chi squared or Fisher's exact tests for categorical variables.



Table 3: Postnatal growth measurements in infants born at <34 weeks' gestational age and cared for in a neonatal unit in Malaysia and one in the UK

| Variables                                                                       | Malaysia<br>n=50          | UK<br>n=50               | MD<br>(95% CI)             | p-value |
|---------------------------------------------------------------------------------|---------------------------|--------------------------|----------------------------|---------|
| Days to regain birth weight**                                                   | 12<br>(11-14)             | 13<br>(10-16)            | -1 (-3.17 to 1.17)         | 0.247   |
| Maximum weight loss from birth weight (%) **                                    | 4.4 (1.9-7.5)             | 5.7 (2.5-9.4)            | -1.25 (-3.63 to 1.14)      | 0.275   |
| Weight (g) at discharge**                                                       | 2060<br>(1890-2390)       | 2165<br>(2050-2380)      | -105<br>(-252.02 to 42.02) | 0.221   |
| Weight Z-score at discharge**                                                   | -1.65<br>(-2.3 to -1.0)   | -1.3<br>(-1.8 to -0.80)  | -0.35<br>(-0.77 to 0.08)   | 0.088   |
| Changes in weight Z-score from birth to discharge*                              | -1.31<br>(0.57)           | -1.33<br>(0.58)          | 0.01<br>(-0.22 to 0.23)    | 0.975   |
| Infants with weight Z- score change $\geq$ -1.28 from birth to discharge, n (%) | 26 (52)                   | 27 (54)                  | -                          | 0.841   |
| Head circumference at discharge, (cm)*                                          | 31.5 (1.61)               | 31.4 (1.39)              | 0.34(-0.29 to 0.98)        | 0.287   |
| Head circumference Z-score at discharge**                                       | -1.33<br>(-1.69 to -0.59) | -0.91<br>(-1.61 to -0.4) | -0.42<br>(-0.87 to 0.04)   | 0.383   |
| Gestational age at discharge**                                                  | 36.5<br>(35-38)           | 36<br>(35-37)            | 0.50 (-0.53 to 1.52)       | 0.060   |
| Length of stay (days)**                                                         | 36<br>(22-55)             | 28.5<br>(20-52)          | 7.5<br>(-3.87 to 18.87)    | 0.157   |

\*\* Median (IQR); \* Mean (SD); MD, mean or median difference, CI, Confidence Interval. P-values and MD for comparisons between the two groups were determined by the Student's t-test or Mann-Whitney U test for continuous variables and by Chi squared or Fisher's exact tests for categorical variables, as appropriate.

1  
2  
3 Figure 1: Mean weekly weight-for-age z-score (WAZ) (error bars represent the  
4 standard error (SE))  
5  
6  
7  
8  
9  
10  
11  
12  
13  
14  
15  
16  
17  
18  
19  
20  
21  
22  
23  
24  
25  
26  
27  
28  
29  
30  
31  
32  
33  
34  
35  
36  
37  
38  
39  
40  
41  
42  
43  
44  
45  
46  
47  
48  
49  
50  
51  
52  
53  
54  
55  
56  
57  
58  
59  
60

Confidential: For Review Only

1  
2  
3  
4  
5  
6  
7  
8  
9  
10  
11  
12  
13  
14  
15  
16  
17  
18  
19  
20  
21  
22  
23  
24  
25  
26  
27  
28  
29  
30  
31  
32  
33  
34  
35  
36  
37  
38  
39  
40  
41  
42  
43  
44  
45  
46  
47  
48  
49  
50  
51  
52  
53  
54  
55  
56  
57  
58  
59  
60

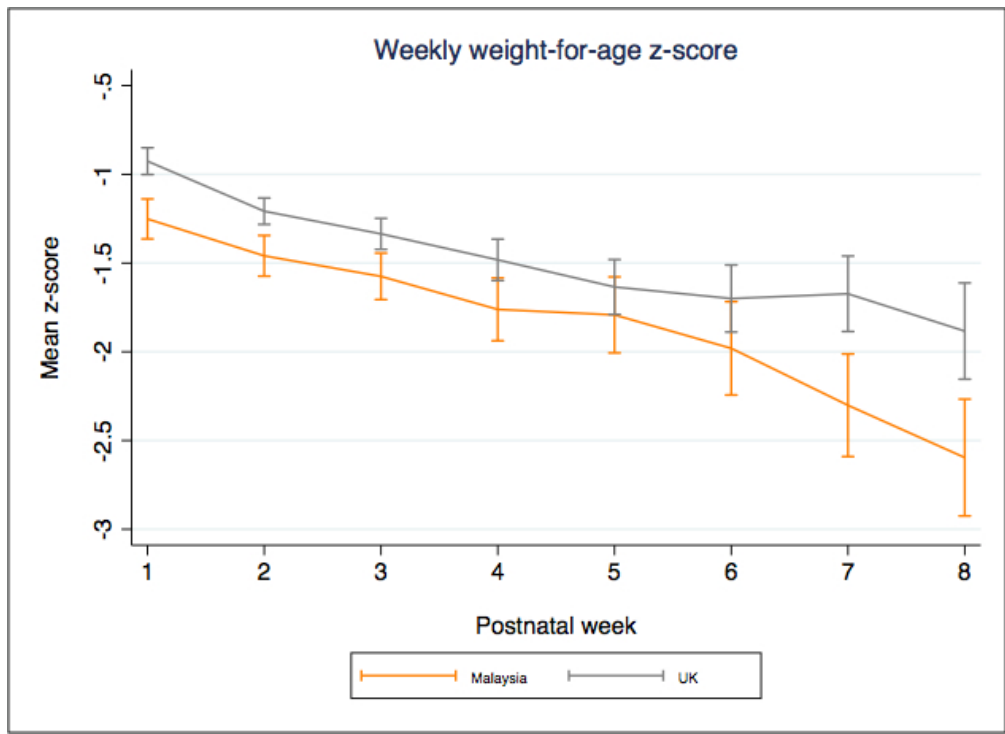

222x161mm (72 x 72 DPI)
